# Supplementary material for: Substance Use During Imprisonment in Low- and Middle-Income Countries
Source: PubMed Central journal article supplement (PMC5982797; doi:10.1093/epirev/mxx016), 2018-03-23
Supplement: mxx016mundtwebmaterialrevised.pdf [file mxx016mundtwebmaterialrevised.pdf]

## Supplementary data

### Substance use during imprisonment in low- and middle-income countries

#### Web Appendix 1. General search string

##### *Prison condition:*

Prison\* OR imprison\* OR sentence\* OR remand\* OR jail\* OR correctional OR “criminal justice”

##### *Epidemiological studies:*

Epidemiology (Subject Heading) OR prevalence OR incidence

##### *Mental health outcome:*

Mental Disorders (Subject Heading) OR Substance-Related Disorders (Subject Heading) OR psychiatr\* OR psycholog\* OR smok\* OR alcohol\* OR substance OR drug OR addict\* OR inject\*

*Limit:* 1987 to March 2017

#### Web Table 1. Database searches

| <b>SOURCES (11)</b>                                                                                        |                                                                   |                                                                                                                                                                                                                |
|------------------------------------------------------------------------------------------------------------|-------------------------------------------------------------------|----------------------------------------------------------------------------------------------------------------------------------------------------------------------------------------------------------------|
| <b>Prison</b>                                                                                              | <b>Epidemiology</b>                                               | <b>Mental health</b>                                                                                                                                                                                           |
| <b>Applied Social Sciences Index and Abstracts (ASSIA) (24/3/2017) (516)*</b>                              |                                                                   |                                                                                                                                                                                                                |
| psychiatr* OR psycholog* OR smok* OR alcohol* OR substance OR drug OR addict* OR inject* (227,050)         | prevalence OR incidence OR su.Exact("epidemiology") (30,037)      | (su.Exact("substance-related disorders") OR su.Exact("substance abuse" OR "substance abuse disorders")) OR (psychiatr* OR psycholog* OR smok* OR alcohol* OR substance OR drug OR addict* OR inject*) (17,392) |
| <b>CAB Abstracts 1973 to 2017 Week 11 (24/3/2017) (225)*</b>                                               |                                                                   |                                                                                                                                                                                                                |
| (Prison* or imprison* or sentence* or remand* or jail* or correctional or criminal justice).mp (2,003)     | epidemiology/ or (prevalence OR incidence).mp. (422,950)          | mental disorders/ or substance abuse/ or (psychiatr* or psycholog* or smok* or alcohol* or substance or drug or addict* or inject*).mp. (792,500)                                                              |
| <b>Criminal Justice Database (24/3/2017) (607)*</b>                                                        |                                                                   |                                                                                                                                                                                                                |
| all(Prison* OR imprison* OR sentence* OR remand* OR jail* OR correctional OR “criminal justice”) (135,926) | all(prevalence OR incidence) OR su.Exact("epidemiology") (13,226) | su.Exact("mental disorders") OR su.Exact("substance-related disorders") OR all(psychiatr* OR psycholog*                                                                                                        |

|                                                                                                                                                                    |                                                                                            |                                                                                                                                                                                        |
|--------------------------------------------------------------------------------------------------------------------------------------------------------------------|--------------------------------------------------------------------------------------------|----------------------------------------------------------------------------------------------------------------------------------------------------------------------------------------|
|                                                                                                                                                                    |                                                                                            | OR smok* OR alcohol* OR substance OR drug OR addict*OR inject*) (149,574)                                                                                                              |
| <b>Embase 1980 to 2017 Week 12 (24/3/2017) (3518)*</b>                                                                                                             |                                                                                            |                                                                                                                                                                                        |
| (Prison* or imprison* or sentence* or remand* or jail* or correctional or criminal justice).mp. (55,127)                                                           | epidemiology/ or (prevalence or incidence).mp. (1,863,770)                                 | mental disease/ or substance abuse/ or "substance use"/ or (psychiatr* or psycholog* or smok* or alcohol* or substance or drug or addict* or inject*).mp. (9,217,897)                  |
| <b>Global Health 1973 to 2017 Week 11 (24/3/2017) (857)*</b>                                                                                                       |                                                                                            |                                                                                                                                                                                        |
| (Prison* or imprison* or sentence* or remand* or jail* or correctional or criminal justice).mp (3,264)                                                             | epidemiology/ or (prevalence or incidence).mp. (298,177)                                   | mental disorders/ or substance abuse/ or (psychiatr* or psycholog* or smok* or alcohol* or substance or drug or addict* or inject*).mp. (503,739)                                      |
| <b>International Bibliography of the Social Sciences (IBSS) (24/3/2017) (1098)*</b>                                                                                |                                                                                            |                                                                                                                                                                                        |
| Prison* OR imprison* OR sentence* OR remand* OR jail* OR correctional OR "criminal justice" (37,180)                                                               | su.Exact("epidemiology") OR (prevalence OR incidence) (21,074)                             | su.Exact("mental disorders") OR su.Exact("substance abuse" OR "substance use") OR (psychiatr* OR psycholog* OR smok* OR alcohol* OR substance OR drug OR addict* OR inject*) (172,839) |
| <b>LILACS (4/4/2017) (41)*</b>                                                                                                                                     |                                                                                            |                                                                                                                                                                                        |
| prison\$ OR imprison\$ OR sentence\$ OR remand\$ OR jail\$ OR correctional OR criminal justice [Words] (1362)                                                      | epidemiolog\$ OR prevalence OR incidence [Words] (108,772)                                 | mental OR substance OR psychiatr\$ OR psycholog\$ OR smok\$ OR alcohol\$ OR substance OR drug OR addict\$ OR inject\$ [Words] (136,139)                                                |
| <b>MEDLINE(R) Epub Ahead of Print, In-Process &amp; Other Non-Indexed Citations, Ovid MEDLINE(R) Daily and Ovid MEDLINE(R) 1946 to Present (24/3/2017) (2406)*</b> |                                                                                            |                                                                                                                                                                                        |
| (Prison* or imprison* or sentence* or remand* or jail* or correctional or criminal justice).mp. (46,512)                                                           | Epidemiology/ or (prevalence or incidence).mp. (1,234,033)                                 | Mental Disorders/ or Substance-Related Disorders/ or (psychiatr* or psycholog* or smok* or alcohol* or substance or drug or addict* or inject*).mp. (4,241,016)                        |
| <b>PAIS Index (3/4/2017) (93)*</b>                                                                                                                                 |                                                                                            |                                                                                                                                                                                        |
| prison* OR imprison* OR sentence* OR remand* OR jail* OR correctional OR "criminal justice" (17,806)                                                               | su.Exact("epidemiology") OR (prevalence OR incidence) (6,750)                              | su.Exact("mental disorders") OR su.Exact("substance abuse") OR (psycholog* OR smok* OR alcohol* OR substance OR drug OR addict* OR inject*) (36,460)                                   |
| <b>PsycINFO 1806 to March Week 3 2017 (24/3/2017) (1620)*</b>                                                                                                      |                                                                                            |                                                                                                                                                                                        |
| (Prison* or imprison* or sentence* or remand* or jail*                                                                                                             | epidemiology/ or (prevalence or incidence).mp. [mp=title, abstract, heading word, table of | mental disorders/ or "substance use disorder"/ or (psychiatr* or psycholog* or smok* or                                                                                                |

|                                                                                                                         |                                                                         |                                                                                                                                                                                                                                    |
|-------------------------------------------------------------------------------------------------------------------------|-------------------------------------------------------------------------|------------------------------------------------------------------------------------------------------------------------------------------------------------------------------------------------------------------------------------|
| or correctional or criminal justice).mp. (73,554)                                                                       | contents, key concepts, original title, tests & measures] (149,748)     | alcohol* or substance or drug or addict*OR inject*).mp. (1,176,019)                                                                                                                                                                |
| <b>Scopus (24/3/2017) (4,580)*</b>                                                                                      |                                                                         |                                                                                                                                                                                                                                    |
| TITLE-ABS-KEY ( prison* OR imprison* OR sentence* OR remand* OR jail* OR correctional OR "criminal justice" ) (141,178) | ( TITLE-ABS-KEY ( epidemiolog* OR prevalence OR incidence ) (2,158,208) | TITLE-ABS-KEY ( mental OR substance OR psychiatr* OR psycholog* OR smok* OR alcohol* OR substance OR drug OR addict* OR inject* ) (10,794,492)                                                                                     |
| <b>Social Services Abstracts (24/3/2017) (197)*</b>                                                                     |                                                                         |                                                                                                                                                                                                                                    |
| Prison* OR imprison* OR sentence* OR remand* OR jail* OR correctional OR "criminal justice" (6,532)                     | su.Exact("epidemiology") OR (prevalence OR incidence) (8,922)           | su.Exact("substance-related disorders" OR "substance abuse" OR "substance abuse disorders") OR su.Exact("mental disorders") OR (psychiatr* OR psycholog* OR smok* OR alcohol* OR substance OR drug OR addict* OR inject*) (56,065) |

*\*Number after discarding duplicates*

**Web Table 2.** Grey Literature

| <b>SOURCES (2)</b>                                                                                        |                                                                   |                                                                                                                                                         |
|-----------------------------------------------------------------------------------------------------------|-------------------------------------------------------------------|---------------------------------------------------------------------------------------------------------------------------------------------------------|
| <b>Prison</b>                                                                                             | <b>Epidemiology</b>                                               | <b>Mental Health</b>                                                                                                                                    |
| <b>Open Grey (03/4/2017) (25)†</b>                                                                        |                                                                   |                                                                                                                                                         |
| prison* OR imprison* OR sentence* OR remand* OR jail* OR correctional OR "criminal justice" (3587)        | epidemiolog* OR prevalence OR incidence (14,287)                  | mental OR substance OR psychiatr* OR psycholog* OR smok* OR alcohol* OR substance OR drug OR addict* OR inject* (80,467)                                |
| <b>ProQuest Dissertations &amp; Theses Global (3/4/2017) (375)*</b>                                       |                                                                   |                                                                                                                                                         |
| all(prison* OR imprison* OR sentence* OR remand* OR jail* OR correctional OR "criminal justice") (33,981) | all(prevalence OR incidence) OR su.Exact("epidemiology") (68,101) | su.Exact("drug abuse" OR "drug use" OR "mental disorders") OR all(psycholog* OR smok* OR alcohol* OR substance OR drug OR addict* OR inject*) (593,744) |

*\*Number after discarding duplicates*

*†Hits were not exported in reference manager*

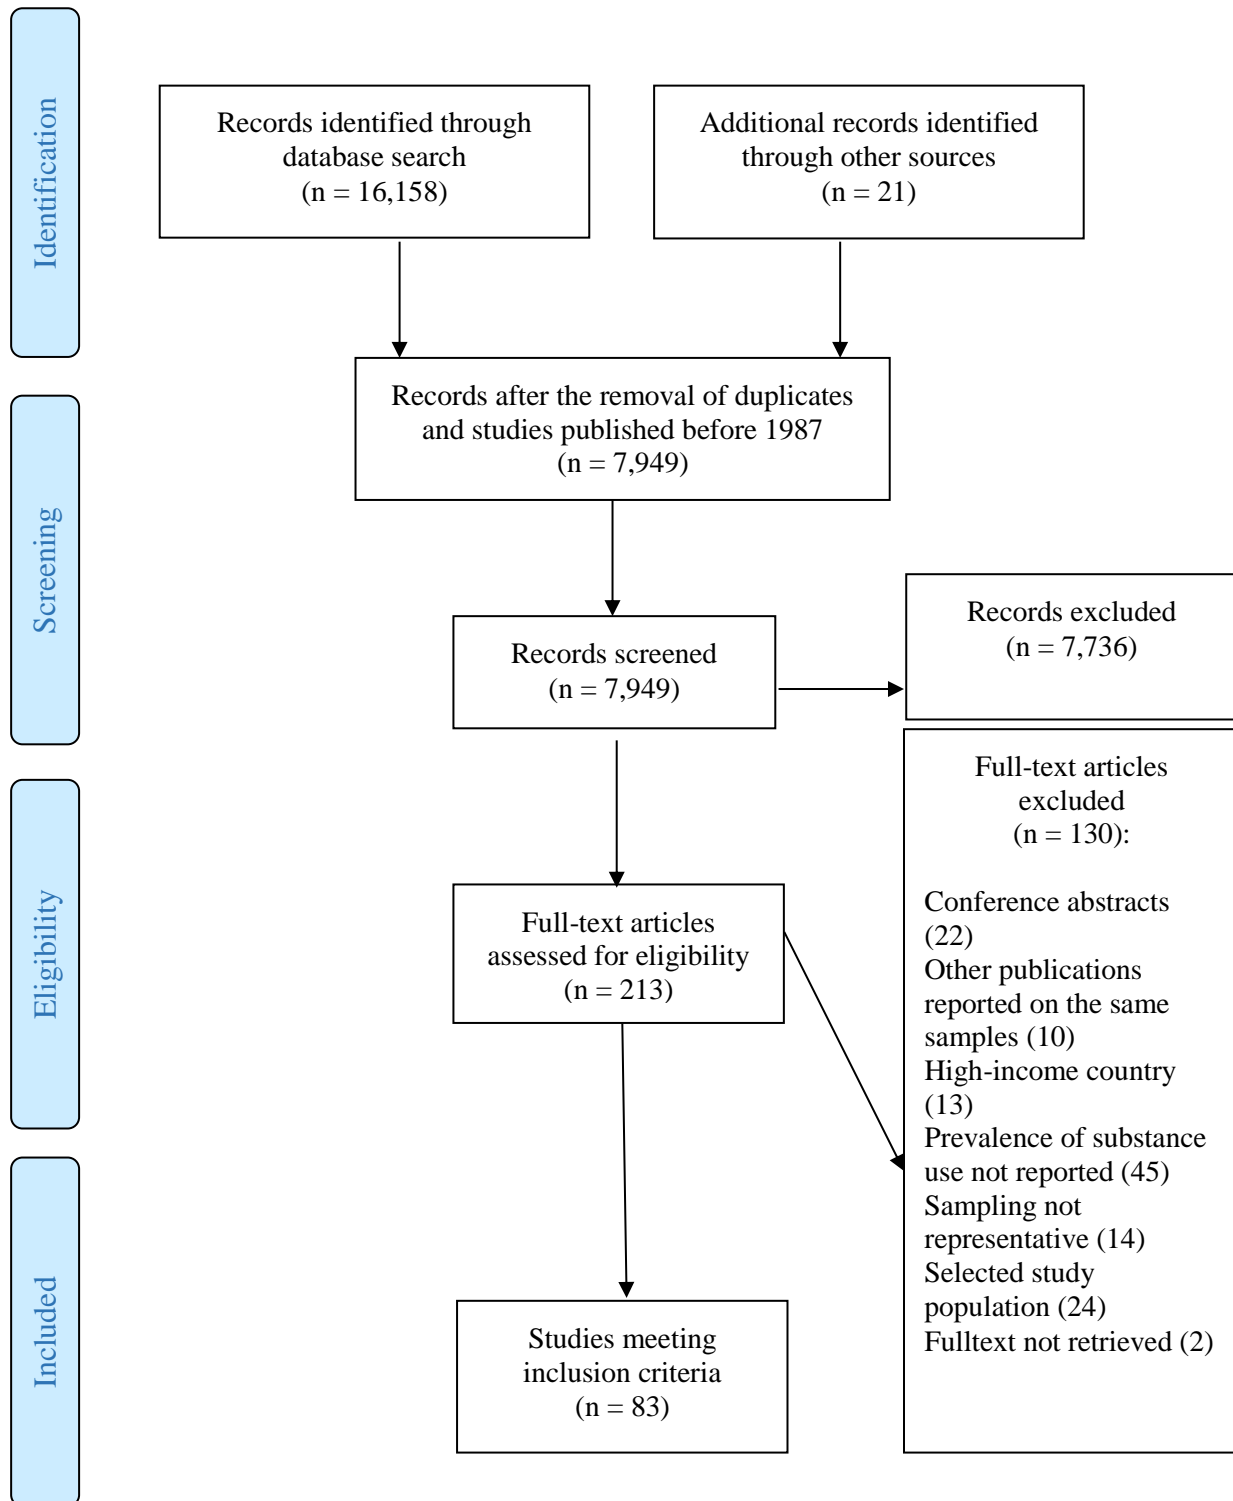

**Web Figure 1.** PRISMA Flow-Chart of studies identified, screened and included in the systematic review on the prevalence of substance use in prison populations in low- and middle-income countries between 1987 and 2017.

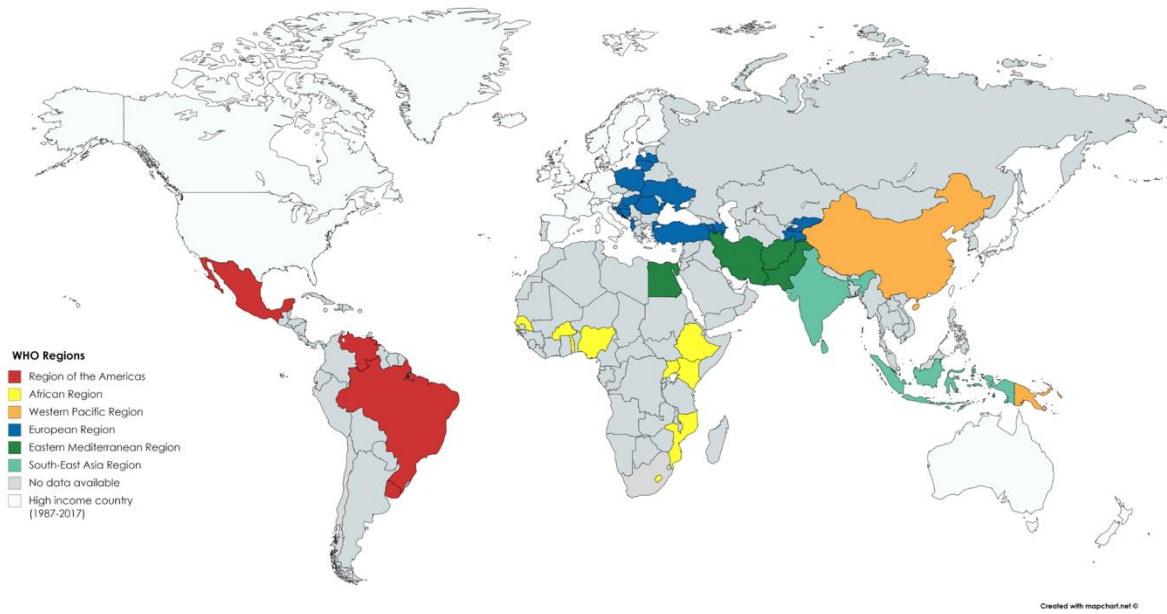

**Web Figure 2.** Map of low- and middle-income countries with data reporting substance use of imprisoned people by WHO-regions. Light grey are countries that have been in the high-income category since the implementation of the categories in 1987. Dark grey represents low- and middle-income countries without identified data.

**Web Table 3.** Meta-regression analyses of study characteristics and the prevalence of nicotine use among people who are imprisoned in low- and middle-income countries.

| Substance<br>Prevalence<br>period                                     | Nicotine use               |        |        |              |                            |          |         |              |
|-----------------------------------------------------------------------|----------------------------|--------|--------|--------------|----------------------------|----------|---------|--------------|
|                                                                       | <i>Before imprisonment</i> |        |        |              | <i>During imprisonment</i> |          |         |              |
|                                                                       | Coefficient<br>( $\beta$ ) | 95% CI |        | P            | Coefficient<br>( $\beta$ ) | 95% CI   |         | P            |
|                                                                       |                            | lower  | upper  |              |                            | lower    | upper   |              |
| Sex                                                                   | 0.209                      | 0.015  | 0.403  | <b>0.036</b> | -0.086                     | -0.353   | 0.181   | 0.510        |
| Age                                                                   | -0.009                     | -0.044 | 0.027  | 0.612        | 0.001                      | -0.032   | 0.035   | 0.927        |
| Sample size                                                           | 2.94e-06                   | -      | 0.0001 | 0.930        | 0.00001                    | -0.0001  | 0.0001  | 0.844        |
| Non-response rate                                                     | 0.001                      | -0.003 | 0.005  | 0.582        | 0.003                      | -0.001   | 0.007   | 0.167        |
| Before imprisonment                                                   | n.a.                       |        |        |              | 0.00006                    | -0.00013 | 0.00025 | 0.490        |
| WHO-regions<br>(Africa Reference category)                            |                            |        |        |              |                            |          |         |              |
| Americas                                                              | 0.086                      | -0.129 | 0.300  | 0.408        | 0.327                      | 0.035    | 0.619   | <b>0.030</b> |
| Eastern Mediterranean                                                 | 0.210                      | -0.012 | 0.432  | 0.062        | 0.277                      | -0.046   | 0.600   | 0.068        |
| Europe                                                                | 0.278                      | 0.082  | 0.474  | <b>0.009</b> | 0.484                      | 0.234    | 0.734   | <b>0.001</b> |
| South East Asia                                                       | 0.088                      | -0.160 | 0.336  | 0.463        | 0.286                      | -0.027   | 0.600   | 0.071        |
| Western Pacific                                                       | 0.186                      | -0.049 | 0.420  | 0.112        | 0.250                      | -0.048   | 0.941   | 0.074        |
| Multivariate meta-regression analyses retaining significant variables |                            |        |        |              |                            |          |         |              |
| Sex                                                                   | 0.198                      | 0.000  | 0.386  | <b>0.050</b> |                            |          |         |              |
| Europe                                                                | 0.236                      | 0.069  | 0.402  | <b>0.009</b> |                            |          |         |              |

**Web Table 4.** Meta-regression analyses of study characteristics and the prevalence of alcohol use among people who are imprisoned in low- and middle-income countries.

| Substance                               | Alcohol use       |                            |         |              |                            |                 |         |       |
|-----------------------------------------|-------------------|----------------------------|---------|--------------|----------------------------|-----------------|---------|-------|
|                                         | Prevalence period | <i>Before imprisonment</i> |         |              | <i>During imprisonment</i> |                 |         |       |
|                                         |                   | Coefficient (β)            | 95% CI  |              | P                          | Coefficient (β) | 95% CI  |       |
|                                         |                   | lower                      | upper   |              |                            | lower           | upper   |       |
| Sex                                     | 0.166             | -0.031                     | 0.364   | 0.094        | 0.145                      | -0.320          | 0.612   |       |
| Age                                     | -0.003            | -0.043                     | 0.037   | 0.879        | -0.016                     | -0.051          | 0.019   | 0.345 |
| Sample size                             | -0.000013         | -                          | 0.00005 | 0.680        | -0.00001                   | -               | 0.00006 | 0.707 |
|                                         |                   | 0.0001                     |         |              |                            | 0.00008         |         |       |
| Non-response rate                       | 0.003             | -0.002                     | 0.008   | 0.174        | -0.002                     | -0.010          | 0.005   | 0.546 |
| Before imprisonment                     | n.a.              |                            |         |              | -0.00001                   | -               | 0.00005 | 0.750 |
|                                         |                   |                            |         |              |                            | 0.00006         |         |       |
| WHO-regions (Africa Reference category) |                   |                            |         |              |                            |                 |         |       |
| Americas                                | -0.012            | -0.159                     | 0.134   | 0.864        | 0.174                      | -0.089          | 0.437   | 0.178 |
| Eastern Mediterranean                   | -0.278            | -0.476                     | -0.079  | <b>0.009</b> | -0.041                     | -0.517          | 0.435   | 0.855 |
| Europe                                  | 0.151             | -0.002                     | 0.303   | <b>0.052</b> | 0.037                      | -0.225          | 0.299   | 0.765 |
| South East Asia                         | -0.179            | -0.420                     | 0.063   | 0.137        | -0.100                     | -0.557          | 0.357   | 0.644 |
| Western Pacific                         | 0.081             | -0.107                     | 0.269   | 0.378        | -0.009                     | -0.498          | 0.481   | 0.970 |

**Web Table 5.** Meta-regression analyses of study characteristics and the prevalence of illicit drug use among people who are imprisoned in low- and middle-income countries.

| Substance                               | Illicit drug use  |                            |          |       |                            |                 |           |       |
|-----------------------------------------|-------------------|----------------------------|----------|-------|----------------------------|-----------------|-----------|-------|
|                                         | Prevalence period | <i>Before imprisonment</i> |          |       | <i>During imprisonment</i> |                 |           |       |
|                                         |                   | Coefficient (β)            | 95% CI   |       | P                          | Coefficient (β) | 95% CI    |       |
|                                         |                   | lower                      | upper    |       |                            | lower           | upper     |       |
| Sex                                     | 0.058             | -0.095                     | 0.211    | 0.449 | -0.041                     | -0.254          | 0.172     | 0.693 |
| Age                                     | -0.016            | -0.048                     | 0.016    | 0.318 | 0.003                      | -0.059          | 0.064     | 0.927 |
| Sample size                             | -0.000061         | -                          | -        | 0.046 | -0.000012                  | -               | 0.0000751 | 0.772 |
|                                         |                   | 0.00012                    | 1.22e-06 |       |                            | 0.000099        |           |       |
| Non-response rate                       | 0.002             | -0.0009                    | 0.005    | 0.193 | -0.003                     | -0.006          | 0.0006    | 0.108 |
| Before imprisonment                     | n.a.              |                            |          |       | 0.00010                    | -0.00013        | 0.00034   | 0.373 |
| WHO-regions (Africa Reference category) |                   |                            |          |       |                            |                 |           |       |
| Americas                                | 0.185             | -0.050                     | 0.420    | 0.119 | 0.216                      | -0.094          | 0.527     | 0.163 |
| Eastern Mediterranean                   | 0.164             | -0.097                     | 0.424    | 0.213 | 0.378                      | -0.028          | 0.784     | 0.066 |
| Europe                                  | -0.095            | -0.326                     | 0.137    | 0.416 | 0.066                      | -0.236          | 0.367     | 0.653 |
| South East Asia                         | -0.161            | -0.453                     | 0.131    | 0.272 | Dropped                    | -               | -         | -     |
| Western Pacific                         | -0.272            | -0.567                     | 0.023    | 0.070 | Dropped                    | -               | -         | -     |



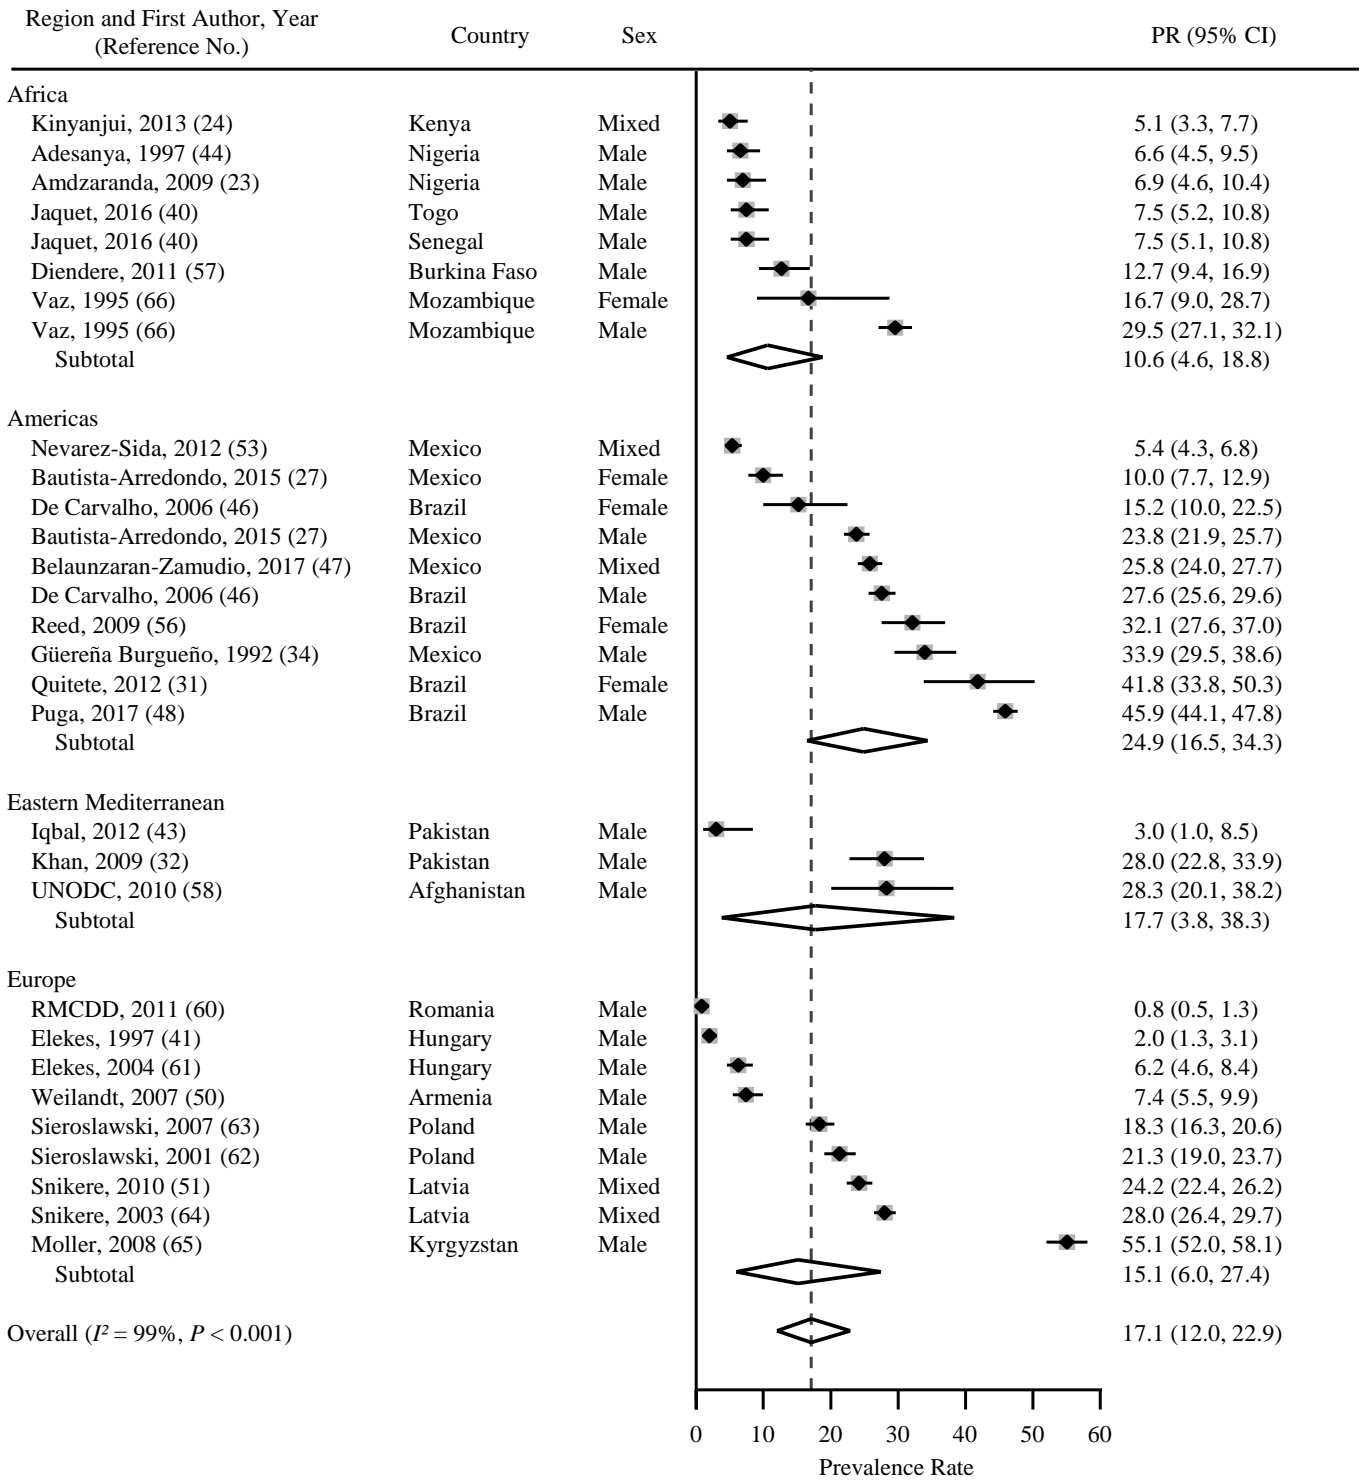

**Web Figure 3.** Prevalence rates and random effects meta-analyses of cannabis use during imprisonment in low- and middle-income countries by regions as defined by the World Health Organization, 1987-2017. CI, confidence interval; PR, prevalence rate.

**Web Table 6.** Meta-regression analyses of study characteristics and the prevalence of cannabis use among people who are imprisoned in low- and middle-income countries.

| Substance                                                                    | Cannabis use      |                            |         |       |           |                            |           |                  |   |
|------------------------------------------------------------------------------|-------------------|----------------------------|---------|-------|-----------|----------------------------|-----------|------------------|---|
|                                                                              | Prevalence period | <i>Before imprisonment</i> |         |       |           | <i>During imprisonment</i> |           |                  |   |
|                                                                              |                   | Coefficient (β)            | 95% CI  |       | P         | Coefficient (β)            | 95% CI    |                  | P |
|                                                                              |                   | lower                      | upper   |       |           | lower                      | upper     |                  |   |
| Sex                                                                          | -0.157            | -0.338                     | 0.024   | 0.086 | -0.043    | -0.206                     | 0.120     | 0.589            |   |
| Age                                                                          | -0.014            | -0.069                     | 0.041   | 0.605 | -0.003    | -0.024                     | 0.018     | 0.779            |   |
| Sample size                                                                  | -<br>0.0000431    | -<br>0.0001                | 0.00002 | 0.161 | 0.0000525 | -9.43e-<br>06              | 0.0001144 | 0.094            |   |
| Non-response rate                                                            | 0.004             | -<br>0.0001                | 0.009   | 0.056 | 0.002     | -0.002                     | 0.006     | 0.396            |   |
| Before imprisonment                                                          | n.a.              |                            |         |       | 0.00019   | 0.00013                    | 0.00024   | <b>&lt;0.001</b> |   |
| WHO-regions (Africa Reference category)                                      |                   |                            |         |       |           |                            |           |                  |   |
| Americas                                                                     | 0.193             | -0.005                     | 0.391   | 0.056 | 0.145     | 0.007                      | 0.284     | <b>0.041</b>     |   |
| Eastern Mediterranean                                                        | Dropped           | -                          | -       | -     | 0.087     | -0.127                     | 0.304     | 0.405            |   |
| Europe                                                                       | 0.009             | -0.189                     | 0.206   | 0.928 | 0.067     | -0.073                     | 0.207     | 0.331            |   |
| South East Asia                                                              | -0.185            | -0.541                     | 0.171   | 0.291 | Dropped   | -                          | -         | -                |   |
| Western Pacific                                                              | Dropped           | -                          | -       | -     | Dropped   | -                          | -         | -                |   |
| <b>Multivariate meta-regression analyses retaining significant variables</b> |                   |                            |         |       |           |                            |           |                  |   |
| Before imprisonment                                                          |                   |                            |         |       | 0.00018   | 0.00012                    | 0.00023   | <b>&lt;0.001</b> |   |
| Americas                                                                     |                   |                            |         |       | 0.036     | -0.054                     | 0.126     | 0.404            |   |

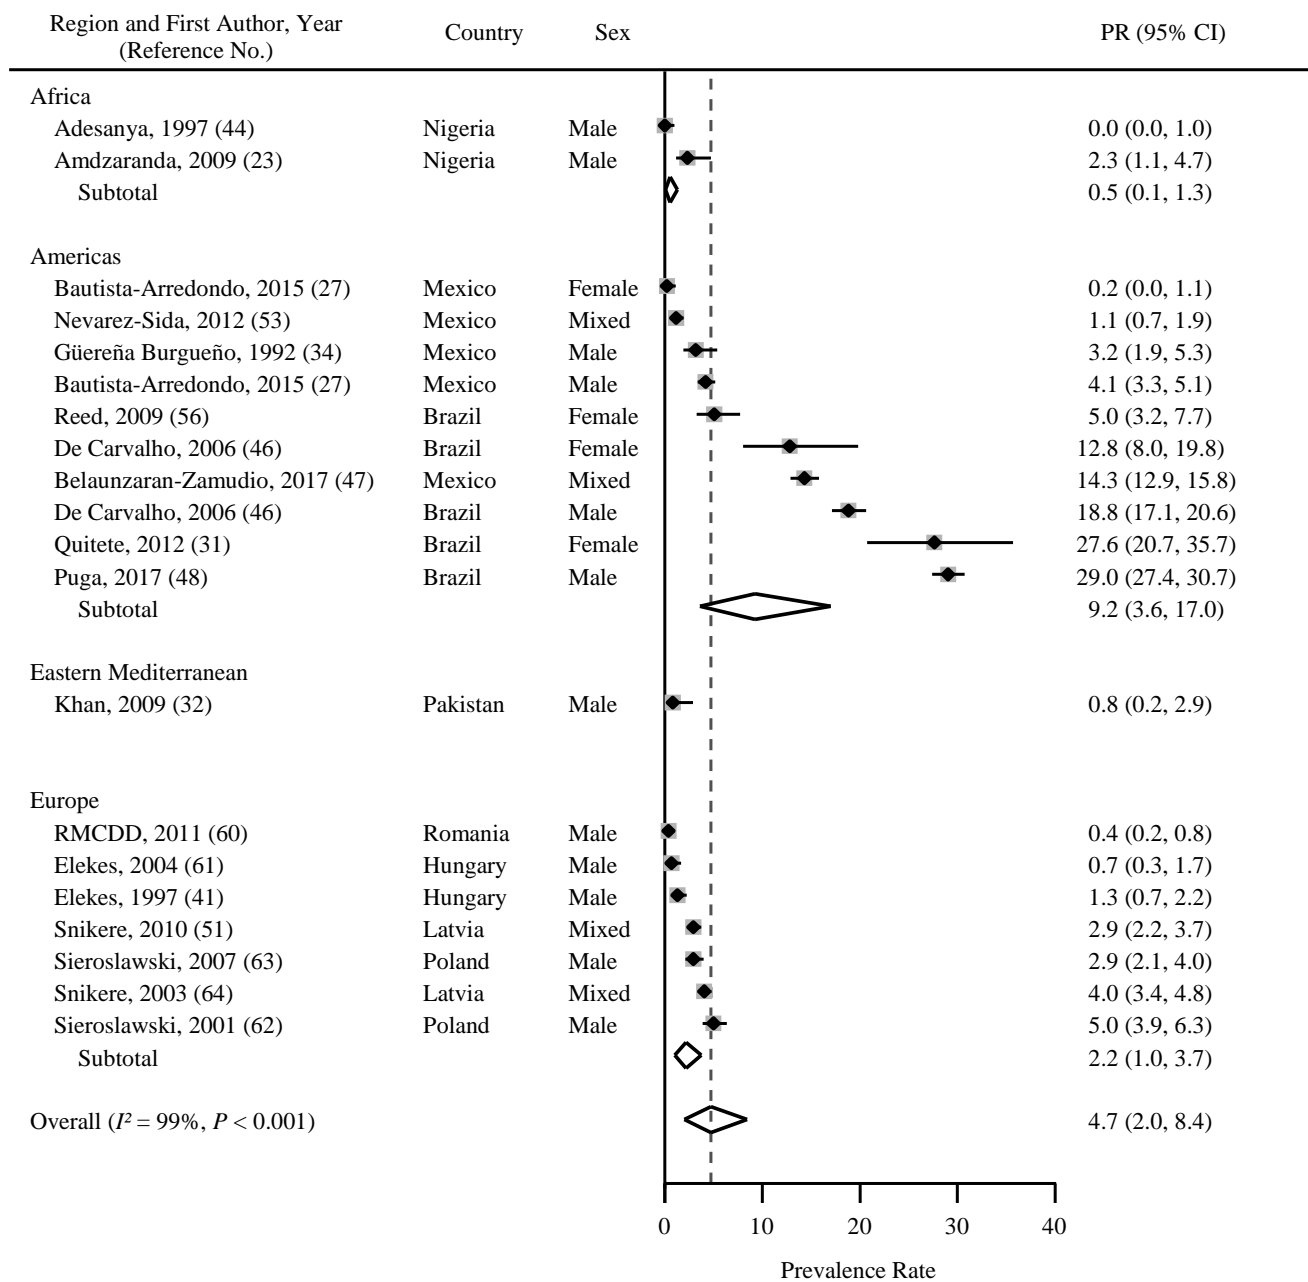

**Web Figure 4.** Prevalence rates and random effects meta-analyses of cocaine use during imprisonment in low- and middle-income countries by regions as defined by the World Health Organization, 1987-2017. The dashed line indicates the overall pooled random effects prevalence. CI, confidence interval; PR, prevalence rate.

**Web Table 7.** Meta-regression analyses of study characteristics and the prevalence of cocaine use among people who are imprisoned in low- and middle-income countries.

| Substance                                                                    | Cocaine use       |                            |         |                  |                            |                 |           |                  |
|------------------------------------------------------------------------------|-------------------|----------------------------|---------|------------------|----------------------------|-----------------|-----------|------------------|
|                                                                              | Prevalence period | <i>Before imprisonment</i> |         |                  | <i>During imprisonment</i> |                 |           |                  |
|                                                                              |                   | Coefficient (β)            | 95% CI  |                  | P                          | Coefficient (β) | 95% CI    |                  |
|                                                                              |                   | lower                      | upper   |                  |                            | lower           | upper     |                  |
| Sex                                                                          | -0.230            | -0.407                     | -0.053  | <b>0.013</b>     | -0.032                     | -0.158          | 0.094     | 0.600            |
| Age                                                                          | -0.003            | -0.058                     | 0.053   | 0.918            | -0.009                     | -0.028          | 0.011     | 0.341            |
| Sample size                                                                  | -0.00003          | -                          | 0.00005 | 0.464            | 0.0000365                  | -7.80e-06       | 0.0000808 | 0.100            |
| Non-response rate                                                            | 0.0003            | -0.005                     | 0.006   | 0.898            | 0.0004                     | -0.003          | 0.003     | 0.787            |
| Before imprisonment                                                          | n.a.              |                            |         |                  | 0.00016                    | 0.00009         | 0.00022   | <b>&lt;0.001</b> |
| WHO-regions (Africa Reference category)                                      |                   |                            |         |                  |                            |                 |           |                  |
| Americas                                                                     | 0.384             | 0.292                      | 0.476   | <b>&lt;0.001</b> | 0.103                      | -0.041          | 0.246     | 0.150            |
| Eastern Mediterranean                                                        | Dropped           | -                          | -       | -                | -0.003                     | -0.244          | 0.238     | 0.979            |
| Europe                                                                       | 0.105             | 0.012                      | 0.197   | <b>0.029</b>     | 0.014                      | -0.132          | 0.160     | 0.843            |
| South East Asia                                                              | Dropped           | -                          | -       | -                | Dropped                    |                 |           | -                |
| Western Pacific                                                              | Dropped           | -                          | -       | -                | Dropped                    |                 |           |                  |
| <b>Multivariate meta-regression analyses retaining significant variables</b> |                   |                            |         |                  |                            |                 |           |                  |
| Sex                                                                          | 0.011             | -0.088                     | 0.112   | 0.811            |                            |                 |           |                  |
| Americas                                                                     | 0.389             | 0.291                      | 0.488   | <b>&lt;0.001</b> |                            |                 |           |                  |
| Europe                                                                       | 0.104             | 0.010                      | 0.198   | <b>0.031</b>     |                            |                 |           |                  |

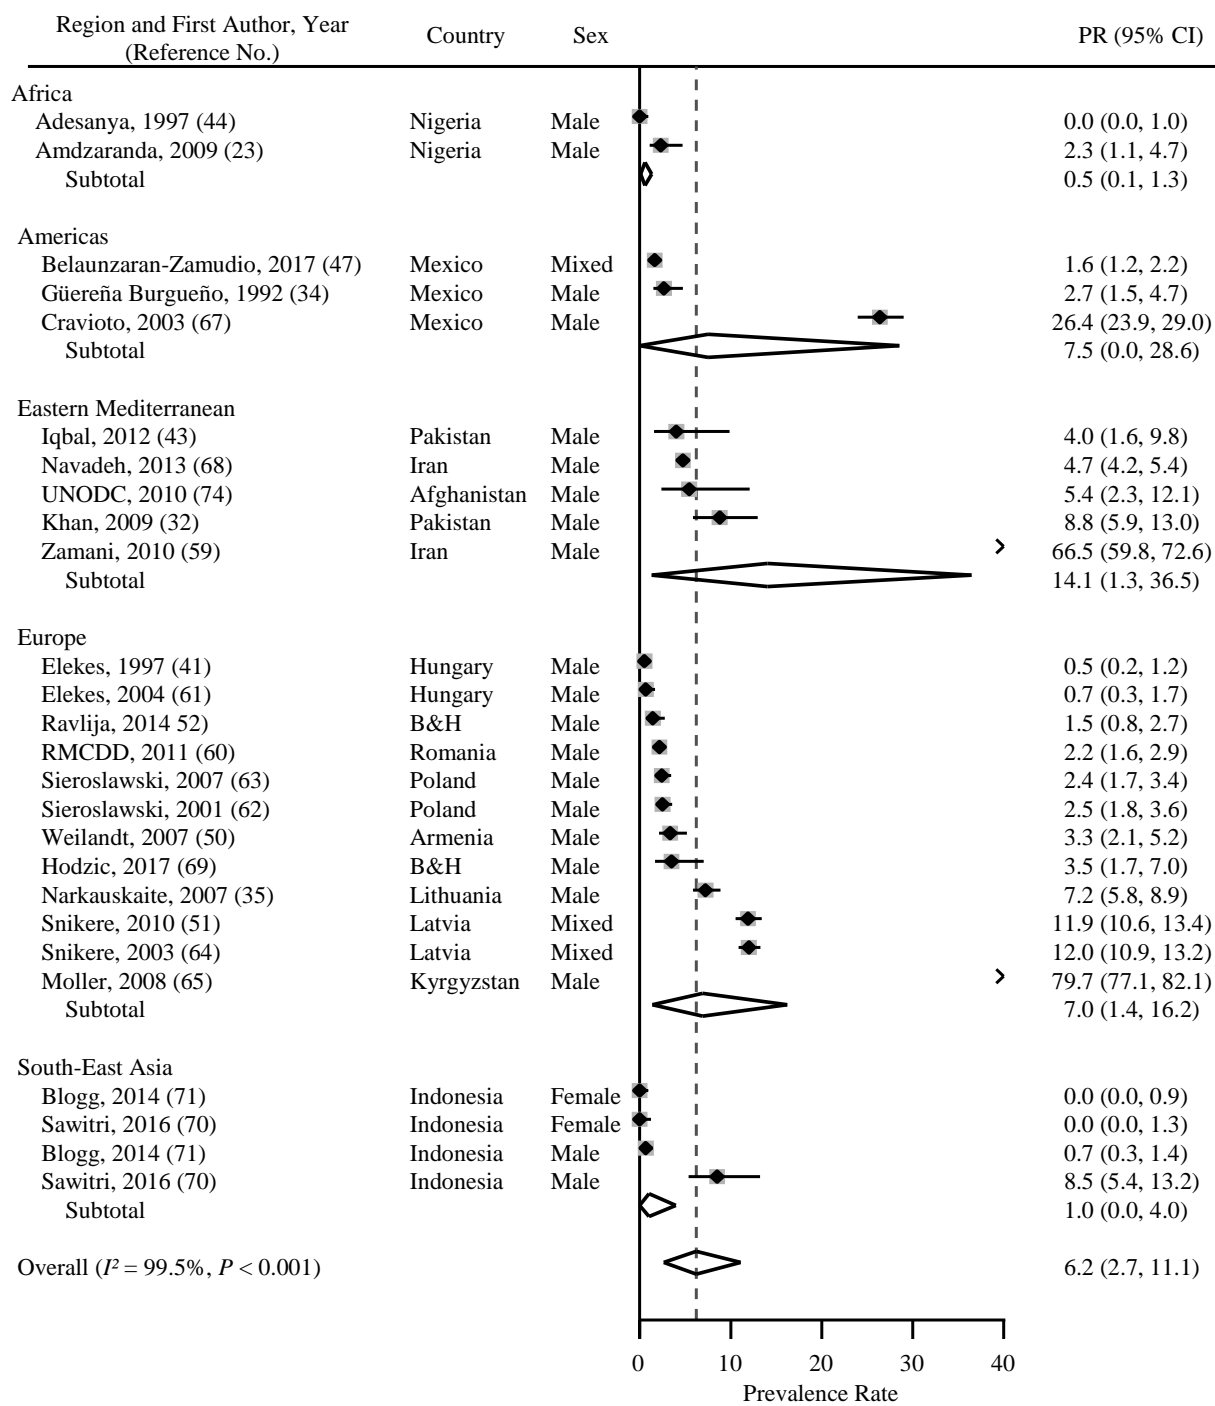

**Web Figure 5.** Prevalence rates and random effects meta-analyses of opiate use during imprisonment in low- and middle-income countries by regions as defined by the World Health Organization, 1987-2017. The dashed line indicates the overall pooled random effects prevalence. B&H, Bosnia and Herzegovina; CI, confidence interval; PR, prevalence rate.

**Web Table 8.** Meta-regression analyses of study characteristics and the prevalence of opiate use among people who are imprisoned in low- and middle-income countries.

| Substance                                                                    | Opiate use        |                            |         |              |                            |                 |           |                  |
|------------------------------------------------------------------------------|-------------------|----------------------------|---------|--------------|----------------------------|-----------------|-----------|------------------|
|                                                                              | Prevalence period | <i>Before imprisonment</i> |         |              | <i>During imprisonment</i> |                 |           |                  |
|                                                                              |                   | Coefficient (β)            | 95% CI  |              | P                          | Coefficient (β) | 95% CI    |                  |
|                                                                              |                   | lower                      | upper   |              |                            | lower           | upper     |                  |
| Sex                                                                          | 0.019             | -0.099                     | 0.138   | 0.743        | 0.111                      | -0.198          | 0.421     | 0.466            |
| Age                                                                          | 0.006             | -0.007                     | 0.019   | 0.349        | 0.006                      | -0.032          | 0.043     | 0.759            |
| Sample size                                                                  | 6.29e-06          | -                          | 0.00004 | 0.711        | -8.02e-06                  | -               | 0.0000712 | 0.836            |
|                                                                              |                   | 0.00003                    |         |              |                            | 0.0000872       |           |                  |
| Non-response rate                                                            | 0.003             | 0.0009                     | 0.005   | <b>0.005</b> | -0.0008                    | -0.004          | 0.003     | 0.654            |
| Before imprisonment                                                          | n.a.              |                            |         |              | 0.0001843                  | 0.0001167       | 0.000252  | <b>&lt;0.001</b> |
| WHO-regions (Africa Reference category)                                      |                   |                            |         |              |                            |                 |           |                  |
| Americas                                                                     | -0.0009           | -0.139                     | 0.137   | 0.989        | 0.092                      | -0.297          | 0.480     | 0.629            |
| Eastern Mediterranean                                                        | 0.178             | 0.054                      | 0.301   | <b>0.006</b> | 0.170                      | -0.192          | 0.532     | 0.341            |
| Europe                                                                       | 0.133             | 0.021                      | 0.246   | <b>0.022</b> | 0.096                      | -0.231          | 0.422     | 0.550            |
| South East Asia                                                              | 0.020             | -0.117                     | 0.157   | 0.769        | 0.011                      | -0.361          | 0.382     | 0.953            |
| Western Pacific                                                              | Dropped           | -                          | -       | -            | Dropped                    | -               | -         | -                |
| <b>Multivariate meta-regression analyses retaining significant variables</b> |                   |                            |         |              |                            |                 |           |                  |
| Non-response rate                                                            | 0.0021            | 0.0005                     | 0.0039  | <b>0.013</b> |                            |                 |           |                  |
| Eastern Mediterranean                                                        | 0.135             | 0.002                      | 0.267   | <b>0.046</b> |                            |                 |           |                  |
| Europe                                                                       | 0.115             | -0.005                     | 0.235   | 0.051        |                            |                 |           |                  |

**Web Table 9.** Meta-regression analyses of study characteristics and the prevalence of injection drug use among people who are imprisoned in low- and middle-income countries.

| Substance                               | Injection drug use |                     |          |                  |                     |                 |         |              |
|-----------------------------------------|--------------------|---------------------|----------|------------------|---------------------|-----------------|---------|--------------|
|                                         | Prevalence period  | Before imprisonment |          |                  | During imprisonment |                 |         |              |
|                                         |                    | Coefficient (β)     | 95% CI   |                  | P                   | Coefficient (β) | 95% CI  |              |
|                                         |                    | lower               | upper    |                  |                     | lower           | upper   |              |
| Sex                                     | 0.002              | -0.084              | 0.088    | 0.959            | 0.016               | -0.045          | 0.078   | 0.580        |
| Age                                     | 0.009              | -0.001              | 0.018    | 0.075            | 0.003               | -0.005          | 0.011   | 0.376        |
| Sample size                             | -6.19e-06          | -                   | 9.87e-06 | 0.443            | -1.24e-06           | -0.000017       | 0.00002 | 0.892        |
| Non-response rate                       | 0.002              | -0.004              | 0.003    | 0.108            | 0.0006              | -0.0007         | 0.002   | 0.337        |
| Before imprisonment                     | n.a.               |                     |          |                  | 0.00007             | -0.00005        | 0.00020 | 0.224        |
| WHO-regions (Africa Reference category) |                    |                     |          |                  |                     |                 |         |              |
| Americas                                | 0.094              | -0.002              | 0.191    | <b>0.054</b>     | 0.012               | -0.060          | 0.085   | 0.727        |
| Eastern Mediterranean                   | 0.167              | 0.061               | 0.277    | <b>0.003</b>     | 0.014               | -0.069          | 0.100   | 0.727        |
| Europe                                  | 0.195              | 0.093               | 0.297    | <b>&lt;0.001</b> | 0.087               | 0.010           | 0.163   | <b>0.028</b> |
| South East Asia                         | 0.039              | -0.087              | 0.167    | 0.533            | 0.013               | -0.074          | 0.101   | 0.755        |
| Western Pacific                         | 0.013              | -0.079              | 0.089    | 0.895            | Dropped             | -               | -       | -            |

**Web Appendix 2.** Nicotine use before imprisonment

Nicotine use before imprisonment was reported for 21 samples from 14 LMIC (24, 25, 27, 29, 33, 40-42, 61, 63, 78, 80, 82-87). The prevalence of nicotine use before imprisonment ranged from 33% to 93% (Web Figure 6). The heterogeneity between the studies was high ( $I^2 = 98.5\%$ ;  $P < 0.001$ ). Pooled rates indicate a prevalence of 70% (95% CI: 64, 76) for people in LMIC prisons. Nicotine use before imprisonment was significantly more frequent in imprisoned men ( $\beta = 0.21$ ;  $P = 0.04$ ) as compared to women and in Europe (82%;  $\beta = 0.278$ ;  $P = 0.009$ ) as compared to Africa (Web Table 3).

### **Web Appendix 3. Alcohol use before imprisonment**

The prevalence rates of alcohol use before imprisonment were reported from 23 samples in 14 LMIC (24, 29, 33, 41, 44-47, 50, 51, 55, 61, 72, 75, 77, 78, 80-84). The prevalence of alcohol use before imprisonment ranged from 33% in Iran to 94% in Hungary ( $I^2 = 99.2\%$ ;  $P < 0.001$ ). The pooled prevalence of alcohol use before imprisonment was 71% (95% CI: 63, 78) for people imprisoned in LMIC (Web Figure 7). There were significant differences in the prevalence of alcohol use with respect to WHO-regions: lower rates in the Eastern Mediterranean (37%;  $\beta = -0.278$ ;  $P = 0.009$ ) and higher rates in Europe (85%;  $\beta = 0.151$ ;  $P = 0.05$ ) as compared to Africa (Web Table 4).

### **Web Appendix 4. Illicit drug use before imprisonment**

There were 50 samples from 21 LMIC reporting prevalence estimates for illicit drug use before imprisonment (26, 27, 29, 34, 35, 38, 41, 42, 45, 47, 49, 51, 52, 54, 55, 58-61, 63-65, 67, 69, 71, 72, 77, 78, 80, 82, 84-98). Estimates for illicit drug use during imprisonment ranged from 9% for men imprisoned in China to 93% for men imprisoned in Iran (Web Figure 8). The heterogeneity between the studies was high ( $I^2 = 99.6\%$ ;  $P < 0.001$ ). Pooled rates of illicit drug use during imprisonment indicate a prevalence of 48% (95% CI: 41, 55) in LMIC. Meta-regression analyses did not show any significant association between study characteristics and illicit drug use before imprisonment (Web Table 5).

### **Web Appendix 5. Cannabis use before imprisonment**

Prevalence estimates of cannabis use before imprisonment were reported for 24 samples in 12 LMIC (24, 27, 29, 40, 41, 44, 46, 47, 49-51, 55, 60-64, 72, 77, 86, 99). Prevalence estimates for cannabis use before imprisonment ranged from 9% to 69% (Web Figure 9). The heterogeneity between the studies was high ( $I^2 = 99.6\%$ ;  $P < 0.001$ ). Pooled rates indicate a prevalence of 37% (95% CI: 28, 47) for cannabis use before imprisonment in LMIC. Study characteristics did not associate with cannabis use before imprisonment (Web Table 6).



### **Web Appendix 6. Cocaine use before imprisonment**

Prevalence estimates of cocaine use during imprisonment were reported for 24 samples in 10 LMIC (24, 27, 40, 41, 44, 46, 47, 49, 51, 54, 55, 60-64, 72, 77, 86, 99, 100). Prevalence estimates for cocaine use during imprisonment ranged from 1% to 52% (Web Figure 10). The heterogeneity between the studies was high ( $I^2 = 99.4\%$ ;  $P < 0.001$ ). Pooled rates indicate that 23% (95% CI: 16, 30) of the people used cocaine before imprisonment in LMIC. Imprisoned women had higher rates cocaine use before imprisonment than imprisoned men ( $\beta = -0.230$ ,  $P = 0.01$ ). The prevalence of cocaine use was significantly higher in the Americas (41.8%,  $\beta = 0.345$ ,  $P < 0.001$ ) and in Europe (22.9%,  $\beta = 0.105$ ,  $P = 0.03$ ) as compared to Africa (Web Table 7).

### **Web Appendix 7. Opiate use before imprisonment**

Prevalence estimates of opiate use before imprisonment were reported for 37 samples in 22 LMIC (24, 26, 27, 29, 38, 40, 41, 44, 47, 49-52, 58, 60-64, 69, 71, 72, 76, 82, 83, 87, 94-96, 101-103). Prevalence estimates for opiate use before imprisonment ranged from 1% to 39% (Web Figure 11). The heterogeneity between the studies was high ( $I^2 = 99.3\%$ ;  $P < 0.001$ ). Pooled rates indicate a prevalence of 10% (95% CI: 3, 11) for opiate use before imprisonment in LMIC. The opiate use before imprisonment was positively associated with the non-response rate ( $\beta = 0.003$ ,  $P = 0.005$ ). Rates of opiate use before imprisonment were significantly higher in the Eastern Mediterranean Region (18.1%,  $\beta = 0.178$ ,  $P = 0.006$ ) and in Europe (15.5%,  $\beta = 0.133$ ,  $P = 0.02$ ) (Web Table 8).

### **Web Appendix 8. Injection drug use before imprisonment**

Estimates for injection drug use before imprisonment were reported for 55 samples from 27 LMIC (26, 27, 29, 32, 35, 38, 40, 41, 44-48, 50, 52, 54, 57, 59, 63, 66, 68-77, 81-83, 85, 87, 89, 91, 93-97, 99-106). Estimates for injection drug use before imprisonment ranged from 0% to 49% (Web Figure 12). The heterogeneity between the studies was high ( $I^2 = 99.3\%$ ;  $P < 0.001$ ). Pooled rates indicated a prevalence of

10% (95% CI: 7, 13) for injection drug use before imprisonment in LMIC. Injection drug use was significantly more frequent in the Americas (9.2%,  $\beta = 0.094$ ,  $P = 0.05$ ), in the Eastern Mediterranean Region (15.7%,  $\beta = 0.167$ ,  $P = 0.003$ ) and in Europe (18.5%,  $\beta = 0.195$ ,  $P = <0.001$ ) as compared to Africa (Web Table 9).

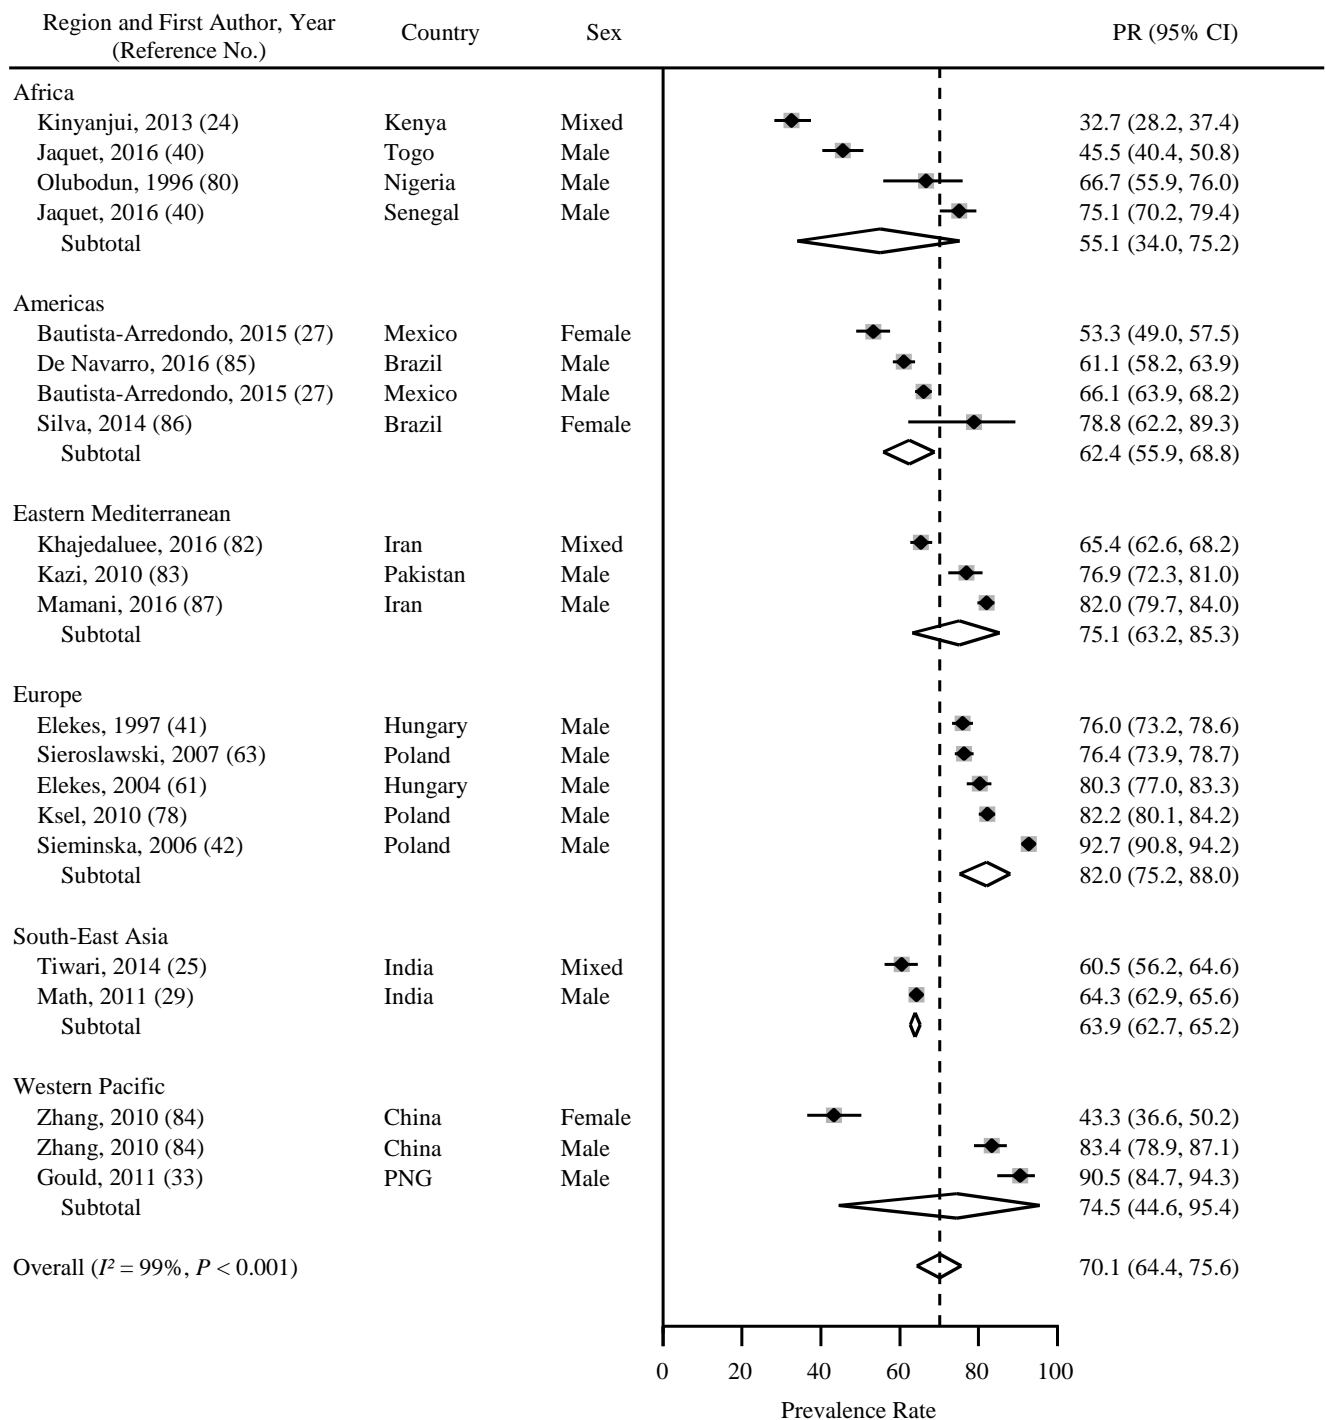

**Web Figure 6.** Prevalence of nicotine use before imprisonment in low- and middle-income countries by regions as defined by the World Health Organization, 1987-2017. The dashed line indicates the overall pooled random effects prevalence. CI, confidence interval; PGN, Papua New Guinea; PR, prevalence rate.

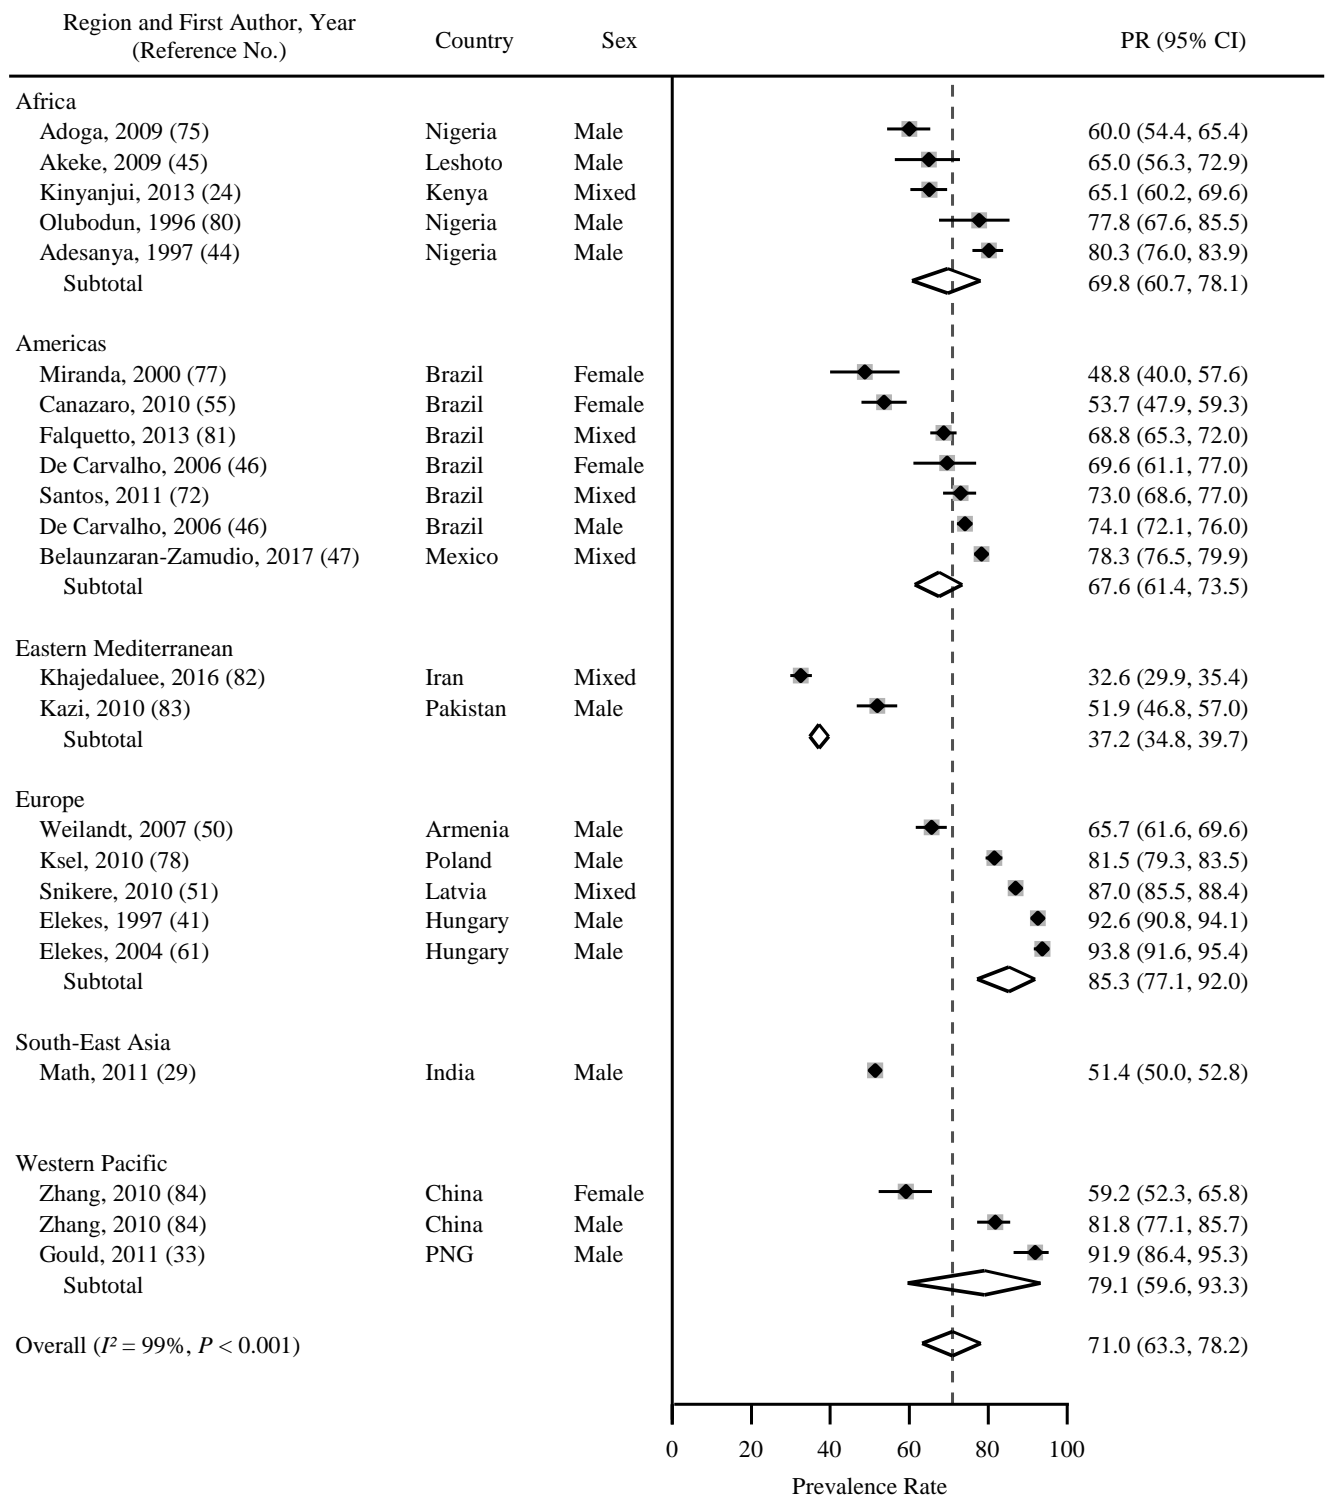

**Web Figure 7.** The prevalence of alcohol use before imprisonment in people who are imprisoned in low- and middle-income countries by regions as defined by the World Health Organization, 1987-2017. The dashed line indicates the overall pooled random effects prevalence. CI, confidence interval; PGN, Papua New Guinea; PR, prevalence rate.

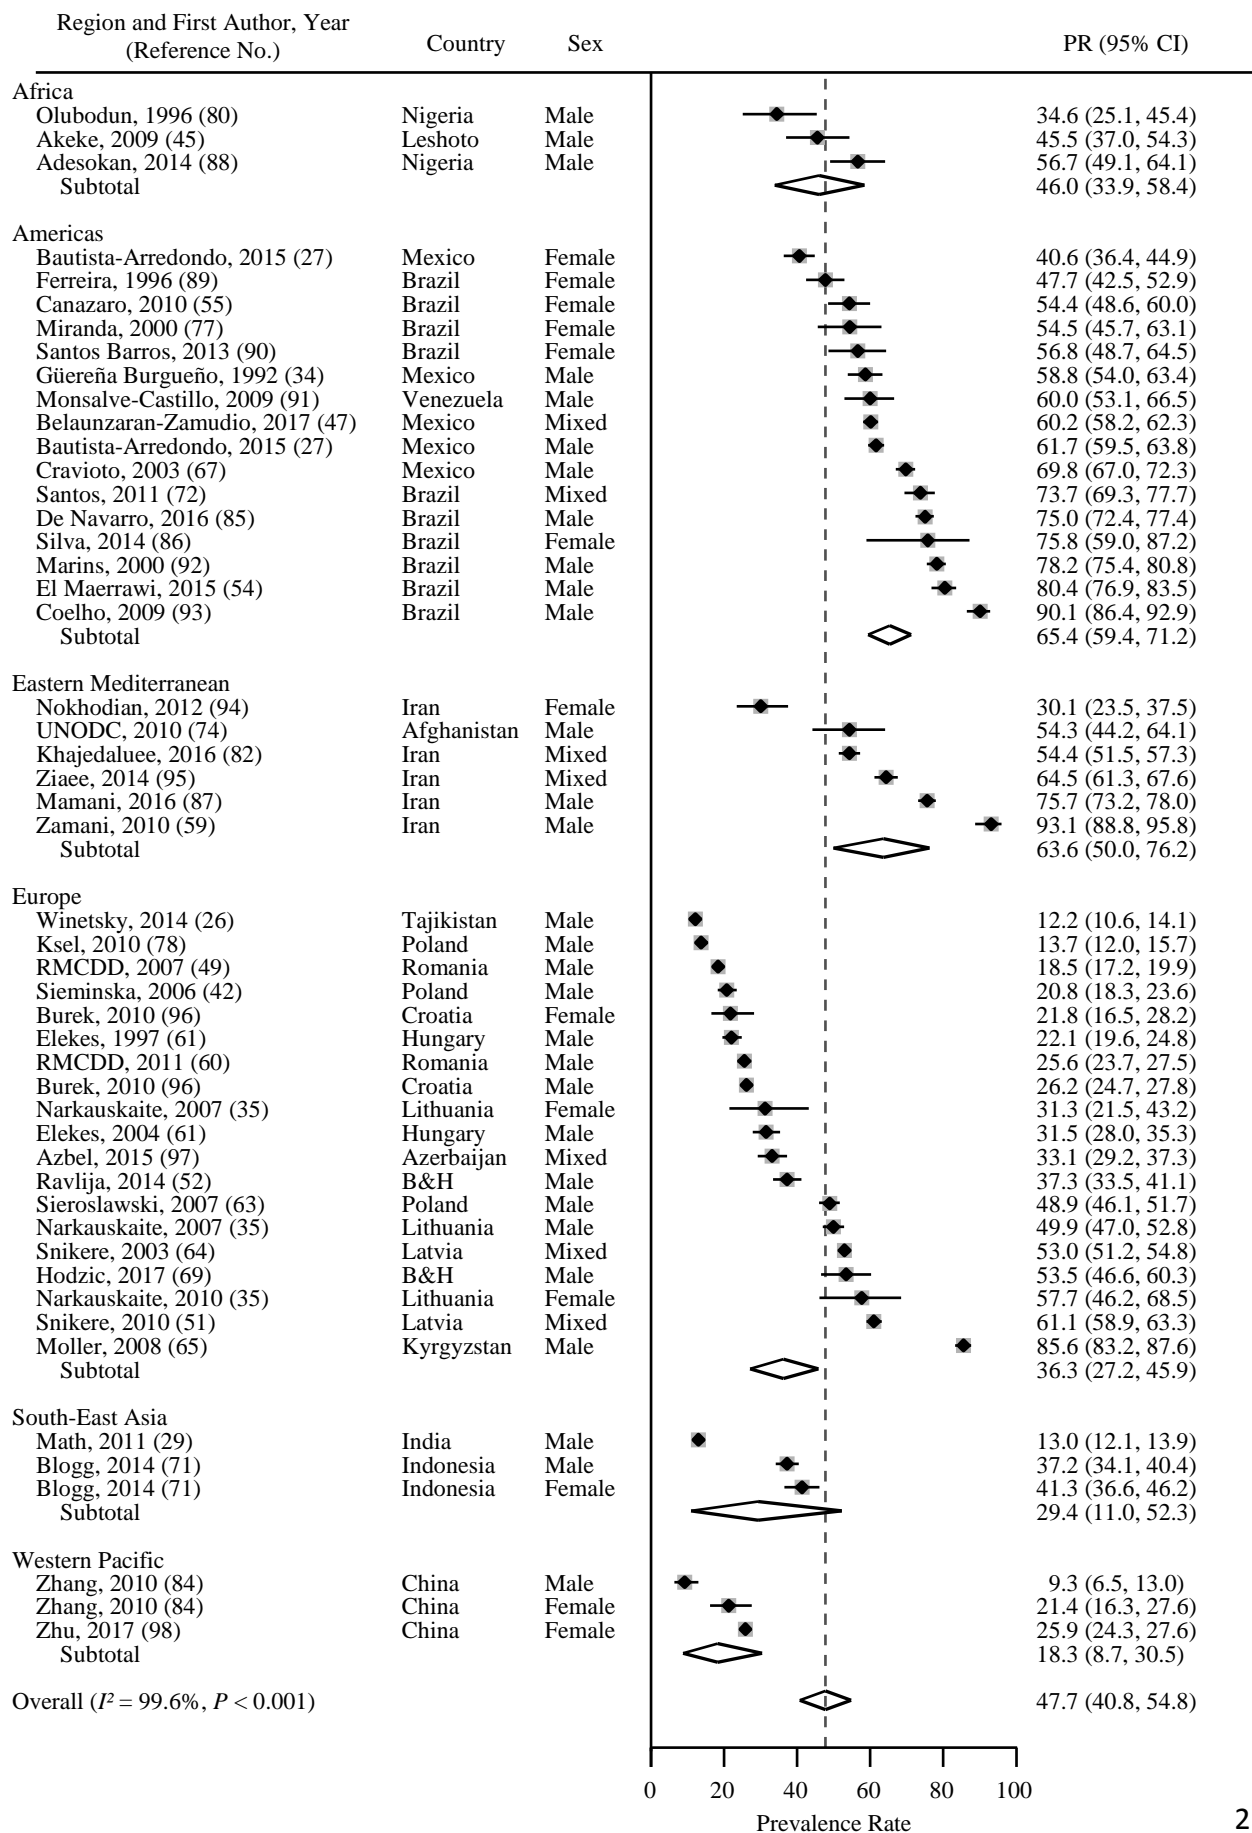

**Web Figure 8.** The prevalence of illicit drug use before imprisonment in low- and middle-income countries by regions as defined by the World Health Organization, 1987-2017. The dashed line indicates the overall pooled random effects prevalence. B&H, Bosnia and Herzegovina; CI, confidence interval; PR, prevalence rate.

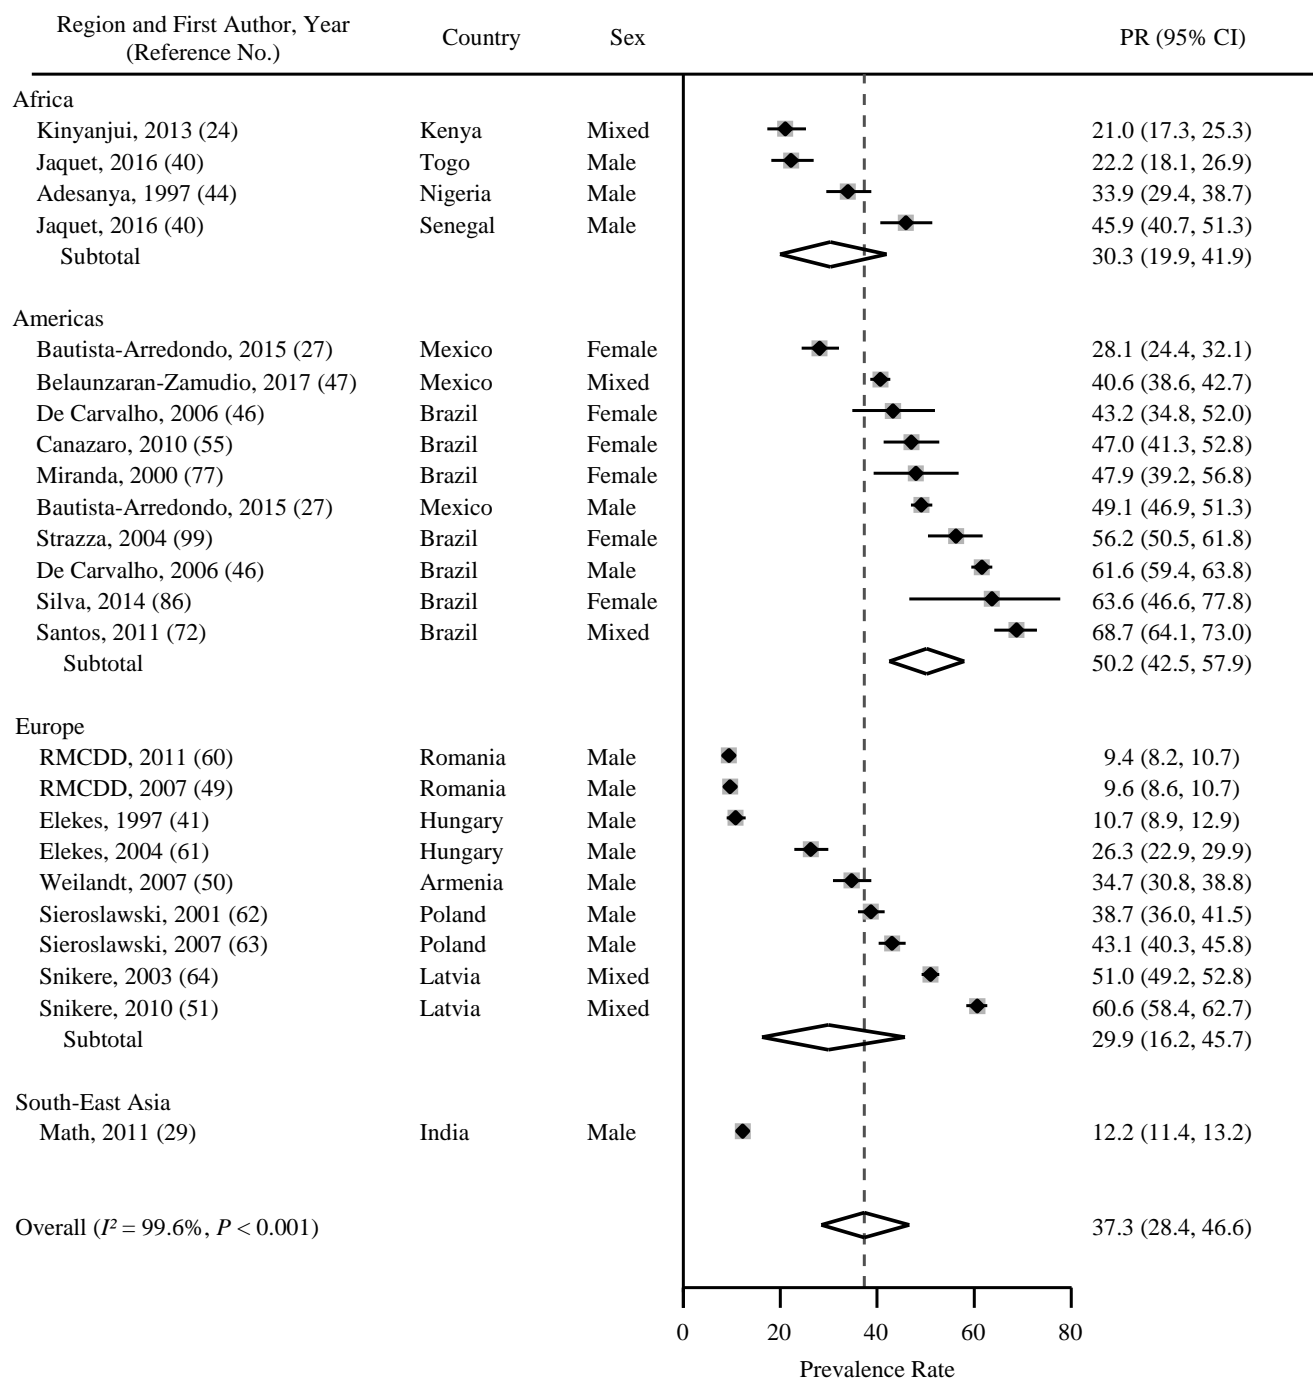

**Web Figure 9.** Random effects meta-analyses for the prevalence of cannabis use before imprisonment in low- and middle-income countries by regions as defined by the World Health Organization, 1987-2017. The dashed line indicates the overall pooled random effects prevalence. CI, confidence interval; PR, prevalence rate.

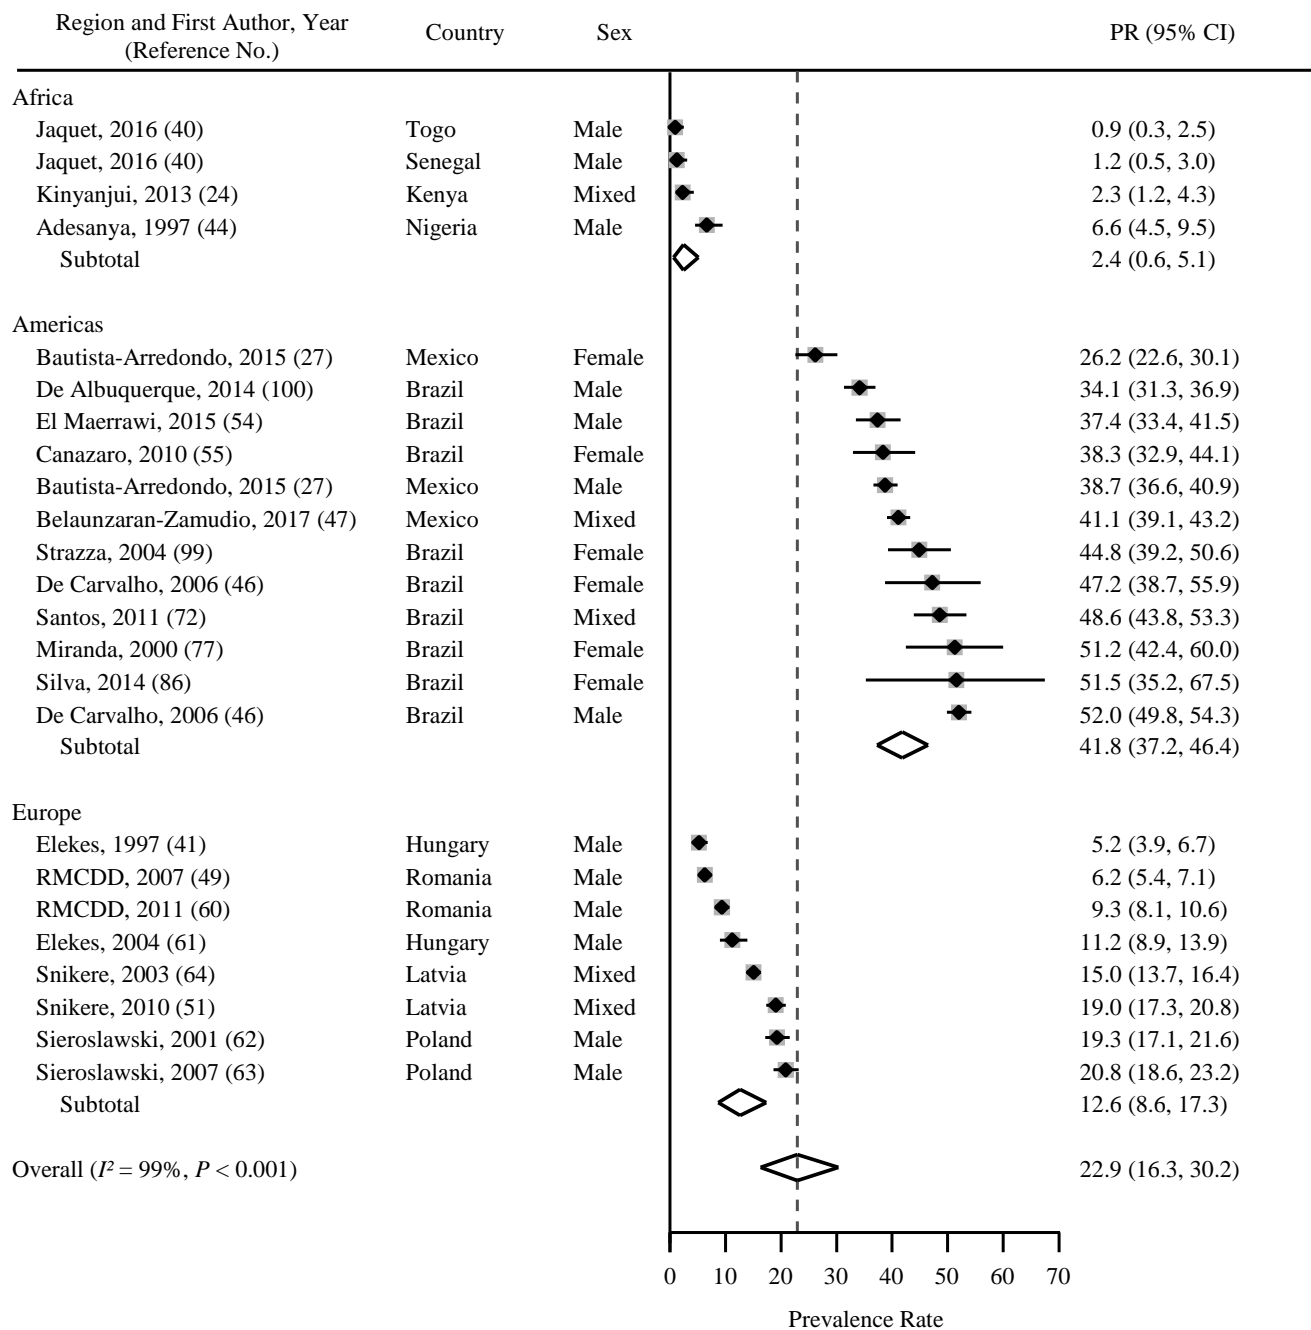

**Web Figure 10.** Random effects meta-analyses for the prevalence of cocaine use before imprisonment in low- and middle-income countries by WHO-Region, 1987-2017. The dashed line indicates the overall pooled random effects prevalence. CI, confidence interval; PR, prevalence rate.



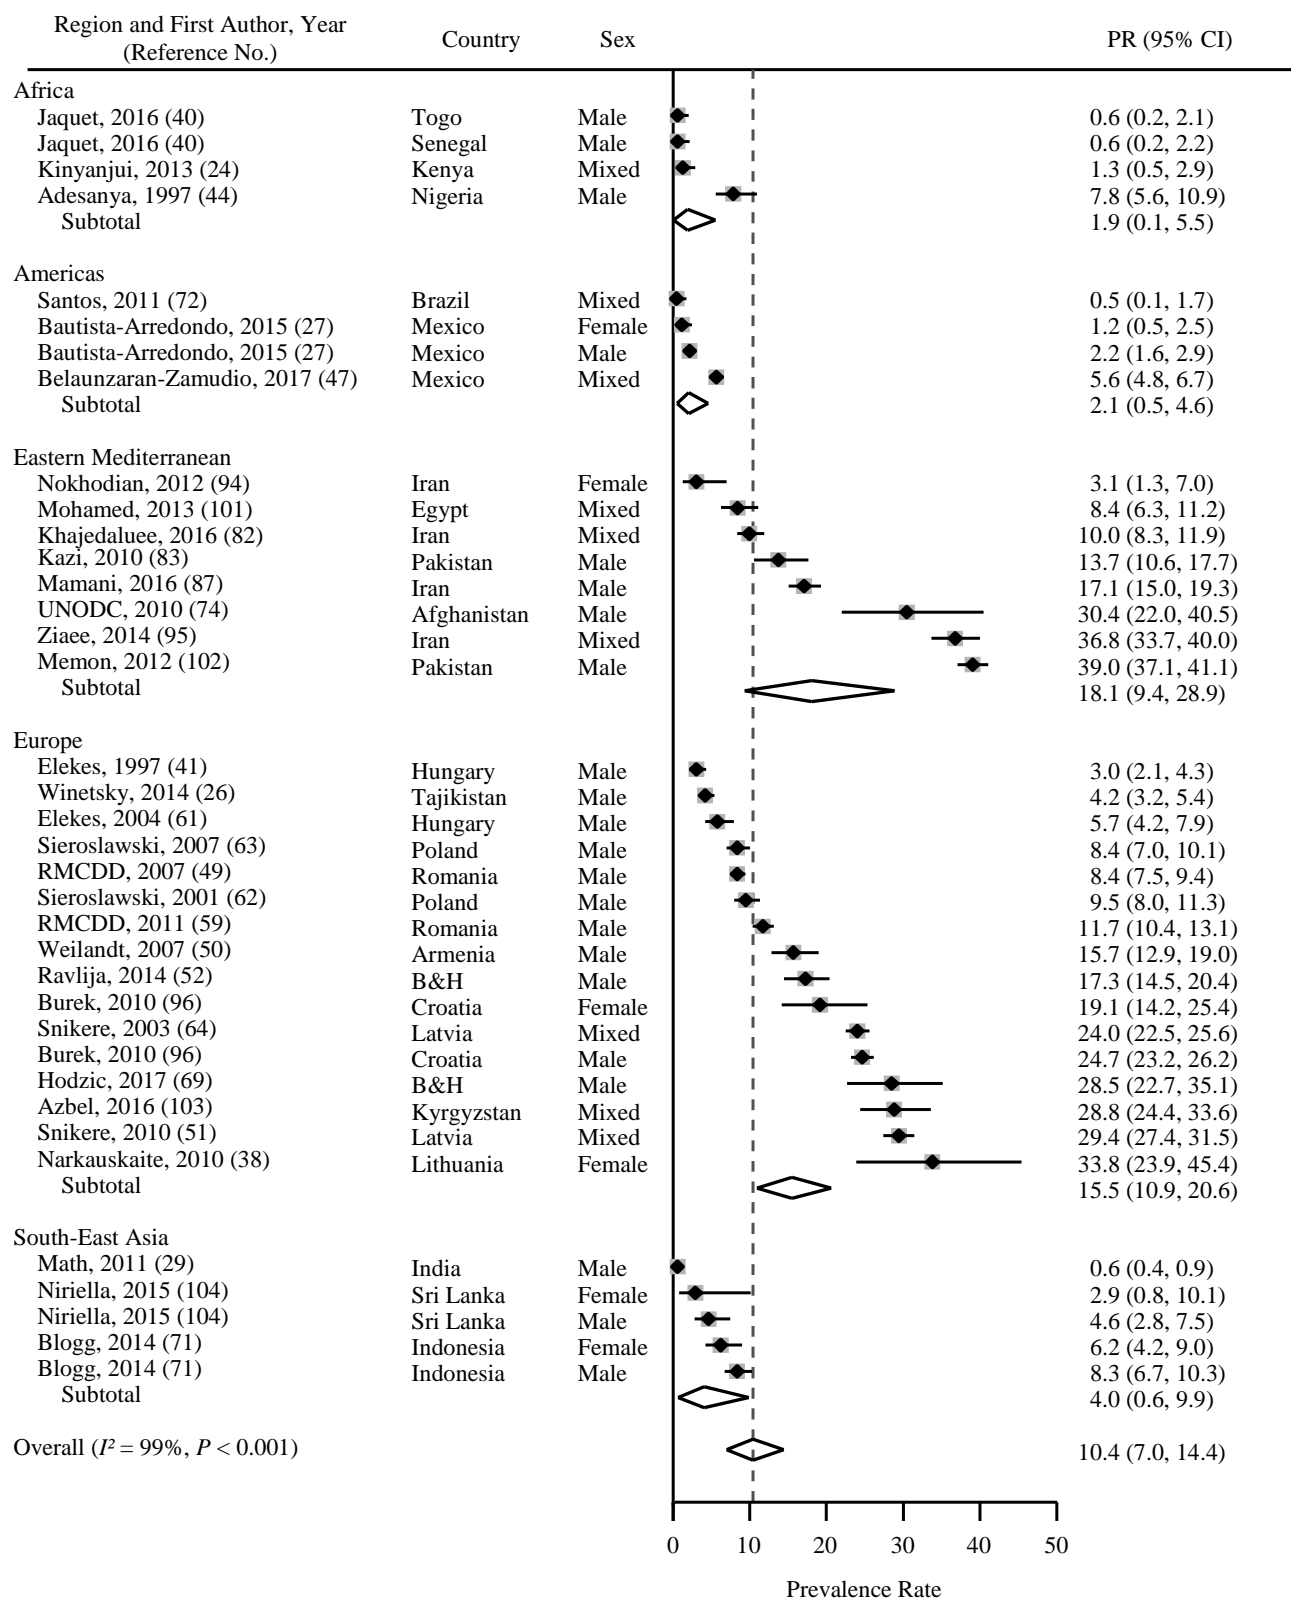

**Web Figure 11.** Random effects meta-analyses for the prevalence of opiate use before imprisonment in low- and middle-income countries by regions as defined by the World Health Organization, 1987-2017. The dashed line indicates the overall pooled random effects prevalence. B&H, Bosnia and Herzegovina; CI, confidence interval; PR, prevalence rate.

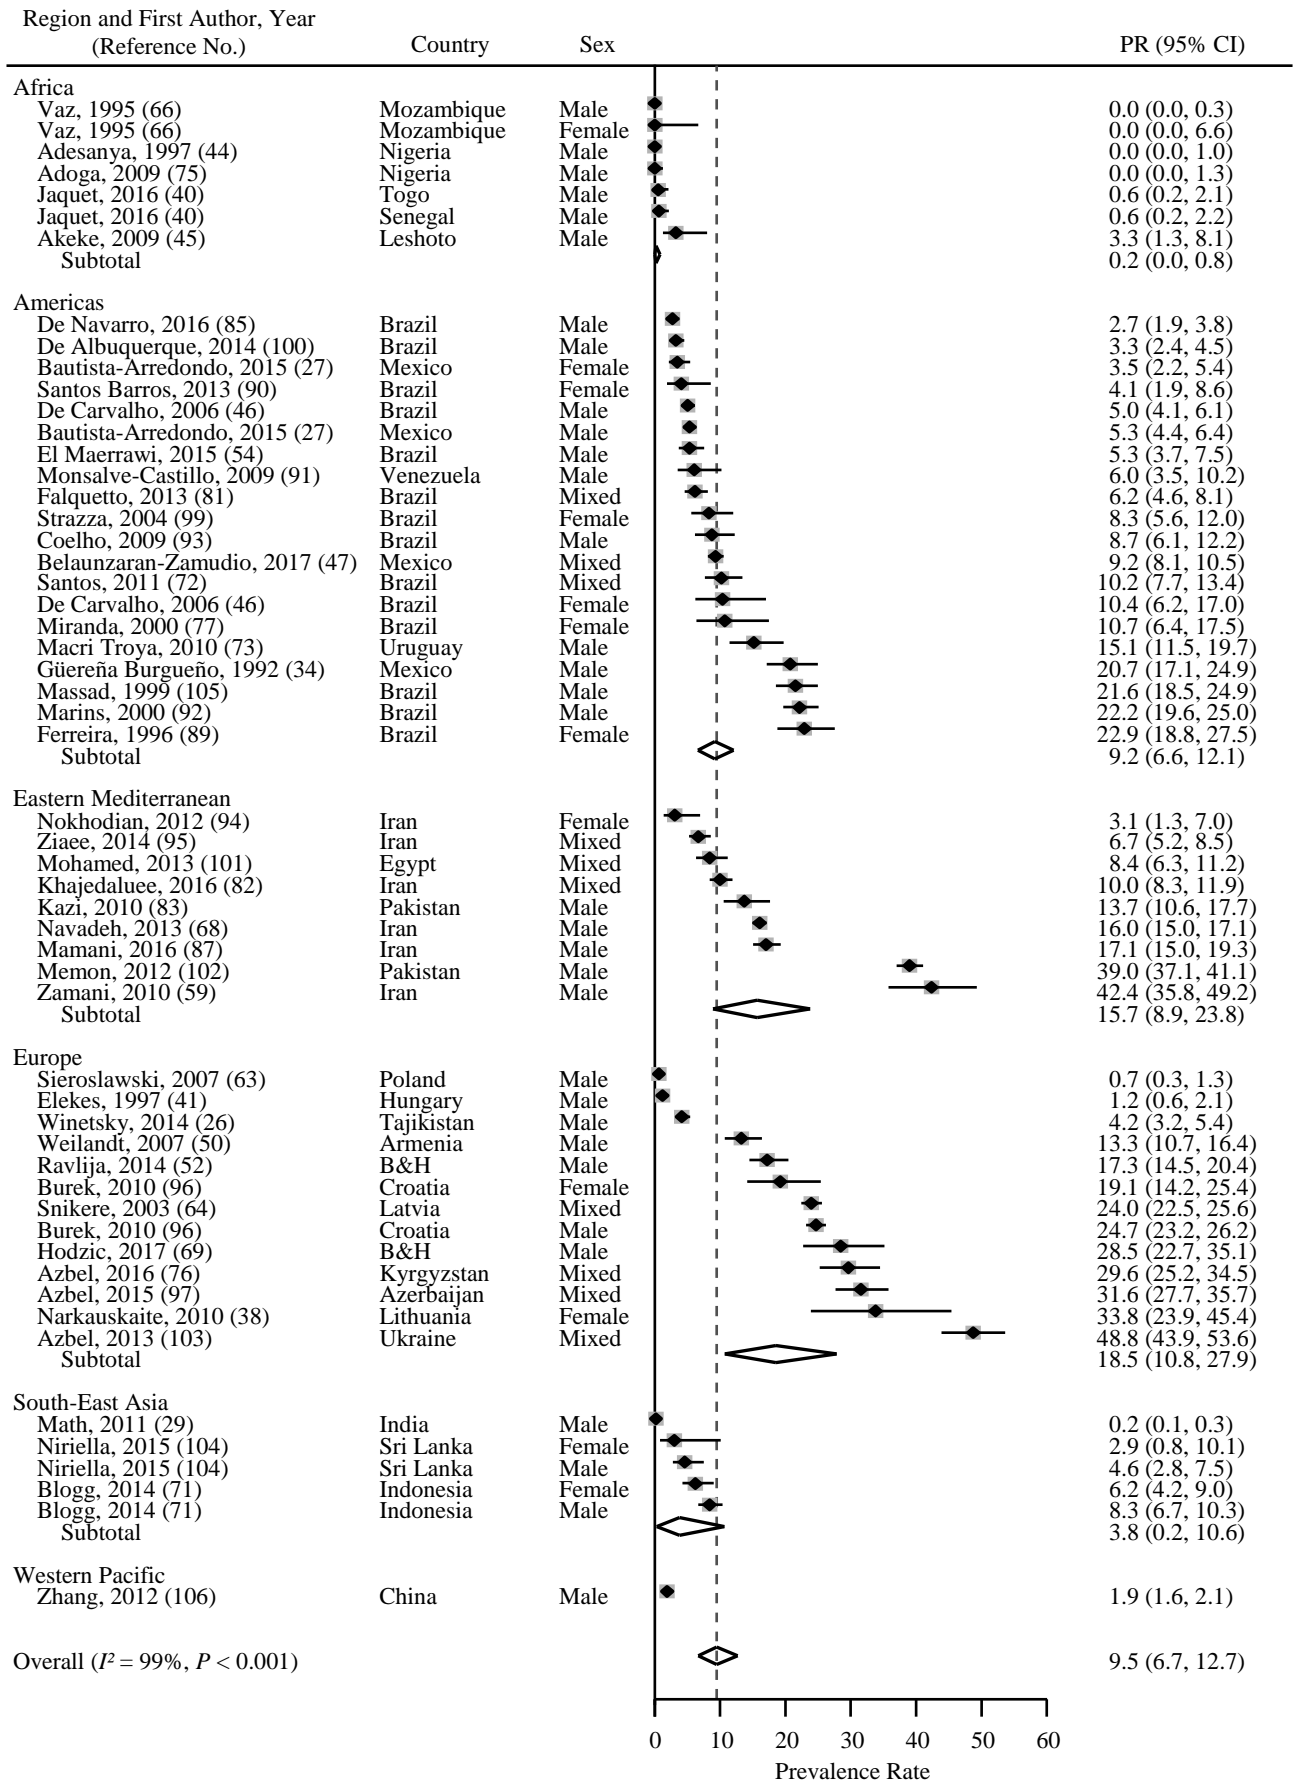

**Web Figure 12:** Random effects meta-analyses for the prevalence of injection drug use before imprisonment in low- and middle-income countries by regions as defined by the World Health Organization, 1987-2017. The dashed line indicates the overall pooled random effects prevalence. B&H, Bosnia and Herzegovina; CI, confidence interval; PR, prevalence rate.

**Web Table 10.** Samples reporting the prevalence of substance use for people imprisoned in low- and middle-income countries, 1987-2017. N.r., not reported.

| First Author, Year (Reference No.) | Year of data collection (final) | Sex    | Region (according to the WHO) | Country    | Sample size | Non-response rate (%) | Mean Age (years) |
|------------------------------------|---------------------------------|--------|-------------------------------|------------|-------------|-----------------------|------------------|
| Adesanya, 1997 (44)                | 1995                            | Male   | Africa                        | Nigeria    | 395         | 4.8                   | 30.4             |
| Adesokan, 2014 (88)                | 2013                            | Male   | Africa                        | Nigeria    | 164         | n.r.                  | n.r.             |
| Adoga, 2009 (75)                   | 2007                            | Male   | Africa                        | Nigeria    | 300         | n.r.                  | 29.2             |
| Akeke, 2009 (45)                   | n.r.                            | Male   | Africa                        | Leshoto    | 123         | 11.0                  | n.r.             |
| Amdzaranda, 209 (23)               | 2006                            | Male   | Africa                        | Nigeria    | 303         | 13.9                  | 31.2             |
| Azbel, 2013 (104)                  | 2011                            | Mixed  | Europe                        | Ukraine    | 402         | 5.6                   | 31.9             |
| Azbel, 2015 (97)                   | 2014                            | Mixed  | Europe                        | Azerbaijan | 510         | 4.7                   | 38.2             |
| Azbel, 2016 (76)                   | 2014                            | Mixed  | Europe                        | Kyrgyzstan | 368         | 3.4                   | 37.4             |
| Bautista-Arredondo, 2015 (27)      | 2010                            | Male   | Americas                      | Mexico     | 1934        | 1.1                   | 33.8             |
| Bautista-Arredondo, 2015 (27)      | 2010                            | Female | Americas                      | Mexico     | 520         | 2.8                   | 34.9             |
| Belaunzaran-Zamudio, 2017 (47)     | 2012                            | Mixed  | Americas                      | Mexico     | 2218        | 48.0                  | n.r.             |
| Blogg, 2014 (71)                   | 2010                            | Male   | South-East Asia               | Indonesia  | 900         | 6.0                   | 32.0             |
| Blogg, 2014 (71)                   | 2010                            | Female | South-East Asia               | Indonasia  | 402         | 5.0                   | 34.0             |
| Burek, 2010 (96)                   | 2007                            | Female | Europe                        | Croatia    | 188         | 24.7                  | 32.0             |
| Burek, 2010 (96)                   | 2007                            | Male   | Europe                        | Croatia    | 3160        | 33.5                  | 32.0             |
| Canazaro, 2010 (55)                | 2008                            | Female | Americas                      | Brazil     | 287         | 22.0                  | 33.4             |
| Coelho, 2009 (93)                  | 2003                            | Male   | Americas                      | Brazil     | 333         | n.r.                  | 30.1             |
| Cravioto, 2003 (67)                | 2000                            | Male   | Americas                      | Mexico     | 1151        | 4.7                   | n.r.             |
| Dadi, 2016 (39)                    | 2015                            | Mixed  | Africa                        | Ethiopia   | 649         | 7.3                   | 30.6             |
| De Albuquerque, 2014 (100)         | 2011                            | Male   | Americas                      | Brazil     | 1097        | 0.3                   | 28.6             |
| De Carvalho, 2006 (46)             | 1998                            | Male   | Americas                      | Brazil     | 1914        | n.r.                  | 30.1             |

|                             |      |        |                       |                        |      |      |      |
|-----------------------------|------|--------|-----------------------|------------------------|------|------|------|
| De Carvalho, 2006 (46)      | 1998 | Female | Americas              | Brazil                 | 125  | n.r. | 32.9 |
| De Navarro, 2016 (85)       | 2013 | Male   | Americas              | Brazil                 | 1120 | 25.0 | 29.0 |
| Diendere, 2011 (57)         | 2009 | Male   | Africa                | Burkina Faso           | 300  | n.r. | 30.1 |
| El Maerrawi, 2015 (54)      | 2007 | Male   | Americas              | Brazil                 | 546  | 16.0 | 29.8 |
| Elekes, 1997 (41)           | 1997 | Male   | Europe                | Hungary                | 951  | 4.9  | n.r. |
| Elekes, 2004 (61)           | 2004 | Male   | Europe                | Hungary                | 609  | 0.0  | 34.5 |
| Falquetto, 2013 (81)        | 2010 | Mixed  | Americas              | Brazil                 | 730  | 18.5 | n.r. |
| Ferreira, 1996 (89)         | 1993 | Female | Americas              | Brazil                 | 350  | 7.4  | 29.0 |
| Gould, 2011 (33)            | 2010 | Male   | Western Pacific       | Papua New Guinea       | 148  | 41.7 | 31.0 |
| Güereña Burgueño, 1992 (34) | 1988 | Male   | Americas              | Mexico                 | 410  | 2.0  | 29.0 |
| Hodzic, 2017 (69)           | 2013 | Male   | Europe                | Bosnia and Herzegovina | 200  | 73.9 | 32.3 |
| Hussain, 2003 (28)          | 2001 | Male   | Eastern Mediterranean | Pakistan               | 425  | 0.0  | 34.8 |
| Iqbal, 2012 (43)            | 2006 | Male   | Eastern Mediterranean | Pakistan               | 100  | 0.0  | 35.0 |
| Jaka, 2014 (30)             | 2013 | Mixed  | Europe                | Albania                | 401  | n.r. | 31.4 |
| Jaquet, 2016 (40)           | 2013 | Male   | Africa                | Togo                   | 347  | 13.6 | 30.0 |
| Jaquet, 2016 (40)           | 2014 | Male   | Africa                | Senegal                | 333  | 13.6 | 30.0 |
| Kazi, 2010 (83)             | 2008 | Male   | Eastern Mediterranean | Pakistan               | 364  | 5.2  | 27.0 |
| Khajedaluae, 2016 (82)      | 2008 | Mixed  | Eastern Mediterranean | Iran                   | 1114 | 5.2  | 35.1 |
| Khan, 2009 (32)             | 2008 | Male   | Eastern Mediterranean | Pakistan               | 250  | n.r. | 44.0 |
| Kinyanjui, 2013 (24)        | 2011 | mixed  | Africa                | Kenya                  | 395  | n.r. | 33.3 |
| Ksel, 2010 (78)             | 2003 | Male   | Europe                | Poland                 | 1305 | n.r. | n.r. |
| Macri Troya, 2010 (73)      | 2005 | Male   | Americas              | Uruguay                | 291  | 0.0  | 29.6 |
| Mamani, 2016 (87)           | 2013 | Male   | Eastern Mediterranean | Iran                   | 1208 | 51.7 | n.r. |
| Marins, 2000 (92)           | 1995 | Male   | Americas              | Brazil                 | 914  | 13.7 | 29.0 |

|                                                                            |      |        |                       |                        |      |      |      |
|----------------------------------------------------------------------------|------|--------|-----------------------|------------------------|------|------|------|
| Massad, 1999 (105)                                                         | 1994 | Male   | Americas              | Brazil                 | 631  | 5.5  | 30.8 |
| Math, 2011 (29)                                                            | 2009 | Male   | South-East Asia       | India                  | 5024 | 3.4  | 30.7 |
| Memon, 2012 (102)                                                          | 2008 | Male   | Eastern Mediterranean | Pakistan               | 2285 | n.r. | 42.5 |
| Miranda, 2000 (77)                                                         | 1997 | Female | Americas              | Brazil                 | 121  | 0.8  | 30.2 |
| Mohamed, 2013 (101)                                                        | n.r. | Mixed  | Eastern Mediterranean | Egypt                  | 500  | n.r. | 41.0 |
| Moller, 2008 (65)                                                          | 2005 | Male   | Europe                | Kyrgyzstan             | 1004 | 1.0  | 32.6 |
| Monsalve-Castillo, 2009 (91)                                               | n.r. | Male   | Americas              | Venezuela              | 200  | n.r. | 31.6 |
| Naik, 2014 (37)                                                            | n.r. | Male   | South-East Asia       | India                  | 1600 | 0.0  | n.r. |
| Narkauskaite, 2007 (35)                                                    | 2003 | Male   | Europe                | Lithuania              | 1122 | 86.5 | 27.8 |
| Narkauskaite, 2007 (35)                                                    | 2003 | Female | Europe                | Lithuania              | 67   | 86.5 | 34.4 |
| Narkauskaite, 2010 (38)                                                    | 2009 | Female | Europe                | Lithuania              | 71   | 72.2 | 34.0 |
| Navadeh, 2013 (68)                                                         | 2009 | Male   | Eastern Mediterranean | Iran                   | 4536 | 17.9 | n.r. |
| Nevárez-Sida, 2012 (53)                                                    | 2006 | Mixed  | Americas              | Mexico                 | 1223 | 10.0 | n.r. |
| Niriella, 2015 (103)                                                       | n.r. | Male   | South-East Asia       | Sri Lanka              | 325  | 0.8  | 42.0 |
| Niriella, 2015 (103)                                                       | n.r. | Female | South-East Asia       | Sri Lanka              | 68   | 0.8  | 42.0 |
| Nokhodian, 2012 (94)                                                       | 2009 | Female | Eastern Mediterranean | Iran                   | 163  | 0.0  | 34.5 |
| Olubodun, 1996 (80)                                                        | n.r. | Male   | Africa                | Nigeria                | 81   | 3.6  | 27.7 |
| Puga, 2017 (48)                                                            | 2014 | Male   | Americas              | Brazil                 | 2848 | 10.7 | 31.6 |
| Puga, 2017 (48)                                                            | 2014 | Female | Americas              | Brazil                 | 520  | 10.7 | 31.1 |
| Quitete, 2012 (31)                                                         | n.r. | Female | Americas              | Brazil                 | 134  | 3.6  | 31.5 |
| Ravlija, 2014 (52)                                                         | 2011 | Male   | Europe                | Bosnia and Herzegovina | 620  | n.r. | 34.0 |
| Reed, 2009 (56)                                                            | n.r. | Female | Americas              | Brazil                 | 377  | 27.3 | n.r. |
| Romanian Monitoring Centre for Drugs and Drug Addiction (RMCDD), 2007 (49) | 2010 | Male   | Europe                | Romania                | 2064 | n.r. | n.r. |

|                                                                            |      |        |                       |             |       |      |      |
|----------------------------------------------------------------------------|------|--------|-----------------------|-------------|-------|------|------|
| Romanian Monitoring Centre for Drugs and Drug Addiction (RMCDD), 2011 (60) | 2006 | Male   | Europe                | Romania     | 3218  | n.r. | n.r. |
| Santos, 2011 (72)                                                          | 2010 | Mixed  | Americas              | Brazil      | 422   | 18.7 | 32.7 |
| Santos Barros, 2013 (90)                                                   | 2008 | Female | Americas              | Brazil      | 148   | 1.3  | n.r. |
| Sawitri, 2016 (70)                                                         | 2009 | Male   | South-East Asia       | Indonesia   | 200   | n.r. | 32.8 |
| Sawitri, 2016 (70)                                                         | 2009 | Female | South-East Asia       | Indonesia   | 300   | n.r. | 32.8 |
| Sieminska, 2006 (42)                                                       | n.r. | Male   | Europe                | Poland      | 907   | 0.0  | 32.3 |
| Sieroslowski, 2001 (62)                                                    | 2001 | Male   | Europe                | Poland      | 1189  | n.r. | n.r. |
| Sieroslowski, 2007 (63)                                                    | 2007 | Male   | Europe                | Poland      | 1240  | 11.9 | n.r. |
| Silva, 2014 (86)                                                           | 2013 | Female | Americas              | Brazil      | 33    | 26.6 | n.r. |
| Sniķere, 2003 (64)                                                         | 2003 | Mixed  | Europe                | Latvia      | 2867  | 38.8 | n.r. |
| Sniķere, 2010 (51)                                                         | 2010 | Mixed  | Europe                | Latvia      | 1965  | 56.9 | 31.7 |
| Strazza, 2004 (99)                                                         | 2000 | Female | Americas              | Brazil      | 290   | 3.0  | 31   |
| Tiwari, 2014 (25)                                                          | n.r. | Mixed  | South-East Asia       | India       | 506   | 41.5 | 35.8 |
| Turan, 2015 (36)                                                           | 2013 | Male   | Europe                | Turkey      | 109   | 13.5 | 37.2 |
| United Nations Office on Drugs and Crime (UNODC), 2009 (74)                | 2008 | Mixed  | Africa                | Uganda      | 459   | 8.2  | n.r. |
| United Nations Office on Drugs and Crime (UNODC), 2010 (58)                | n.r. | Male   | Eastern Mediterranean | Afghanistan | 92    | n.r. | n.r. |
| Vaz, 1995 (66)                                                             | 1991 | Male   | Africa                | Mozambique  | 1284  | 43.6 | 26.2 |
| Vaz, 1995 (66)                                                             | 1991 | Female | Africa                | Mozambique  | 54    | 27.0 | 29.2 |
| Weilandt, 2007 (50)                                                        | n.r. | Male   | Europe                | Armenia     | 542   | 2.5  | 33.7 |
| Winetsky, 2014 (26)                                                        | 2010 | Male   | Europe                | Tajikistan  | 1317  | 2.4  | 36.0 |
| Zamani, 2010 (59)                                                          | 2007 | Male   | Eastern Mediterranean | Iran        | 203   | n.r. | 34.8 |
| Zhang, 2010 (84)                                                           | 2006 | Male   | Western Pacific       | China       | 313   | 2.0  | 30.4 |
| Zhang, 2010 (84)                                                           | 2006 | Female | Western Pacific       | China       | 201   | 2.0  | 30.5 |
| Zhang, 2012 (106)                                                          | 2011 | Male   | Western Pacific       | China       | 12380 | n.r. | n.r. |
| Zhu, 2017 (98)                                                             | 2013 | Female | Western Pacific       | China       | 2709  | 7.1  | n.r. |

|                  |      |       |                          |      |     |     |      |
|------------------|------|-------|--------------------------|------|-----|-----|------|
| Ziaee, 2014 (95) | 2010 | Mixed | Eastern<br>Mediterranean | Iran | 881 | 2.1 | 34.7 |
|------------------|------|-------|--------------------------|------|-----|-----|------|



**Web Table 11.** Pooled **fixed-effects** prevalence estimates of substance use before and during imprisonment in low- and middle-income countries. CI, confidence interval.

| Substance          | Before imprisonment |        |       | During imprisonment |        |       |
|--------------------|---------------------|--------|-------|---------------------|--------|-------|
|                    | Prevalence          | 95% CI |       | Prevalence          | 95% CI |       |
|                    | (%)                 | Lower  | Upper | (%)                 | Lower  | Upper |
| Nicotine use       | 70.1                | 69.5   | 70.8  | 56.7                | 56.2   | 57.6  |
| Alcohol use        | 69.5                | 68.8   | 70.1  | 14.0                | 13.5   | 14.4  |
| Illicit drug use   | 40.5                | 40.0   | 40.9  | 23.1                | 22.6   | 23.6  |
| Cannabis use       | 31.0                | 30.5   | 31.6  | 20.5                | 20.0   | 21.0  |
| Cocaine use        | 20.9                | 20.4   | 21.4  | 6.2                 | 5.9    | 6.5   |
| Opiate use         | 10.6                | 10.3   | 10.9  | 6.4                 | 6.1    | 6.7   |
| Injection drug use | 7.4                 | 7.2    | 7.6   | 1.9                 | 1.7    | 2.0   |
